# Supplementary material
Source: ML conference proceedings conference paper supplement (https://openreview.net/forum?id=ZBxycYCuEL)
Supplement: supplementary_material [file attachment]

---

# Stability Guarantees for Feature Attributions with Multiplicative Smoothing

---

Anonymous Author(s)

Affiliation

Address

email

## Abstract

1 Explanation methods for machine learning models tend to not provide any formal  
2 guarantees and may not reflect the underlying decision-making process. In this  
3 work, we analyze stability as a property for reliable feature attribution methods.  
4 We prove that a relaxed variant of stability is guaranteed if the model is sufficiently  
5 Lipschitz with respect to the masking of features. To achieve such a model, we  
6 develop a smoothing method called Multiplicative Smoothing (MuS). We show  
7 that MuS overcomes theoretical limitations of standard smoothing techniques and  
8 can be integrated with any classifier and feature attribution method. We evaluate  
9 MuS on vision and language models with a variety of feature attribution methods,  
10 such as LIME and SHAP, and demonstrate that MuS endows feature attributions  
11 with non-trivial stability guarantees.

## 12 1 Introduction

13 Modern machine learning models are incredibly powerful at challenging prediction tasks but notori-  
14 ously black-box in their decision-making. One can therefore achieve impressive performance without  
15 fully understanding *why*. In settings like like medical diagnosis [1, 2] and legal analysis [3, 4], where  
16 accurate and well-justified decisions are important, such power without proof is insufficient. In order  
17 to fully wield the power of such models while ensuring reliability and trust, a user needs accurate and  
18 insightful *explanations* of model behavior.

19 One popular family of explanation methods is *feature attributions* [5, 6, 7, 8]. Given a model and  
20 input, a feature attribution method generates a score for each input feature that denotes its importance  
21 to the overall prediction. For instance consider Figure 1, in which the Vision Transformer [9] classifier  
22 predicts the full image (left) as “Goldfish”. We then use a feature attribution method like SHAP [7]  
23 to score each feature and select the top-25%, for which the masked image (middle) is consistently  
24 predicted as “Goldfish”. However, additionally including a single patch of features (right) alters  
25 the prediction confidence so much that it now yields “Axolotl”. This suggests that the explanation  
26 is brittle [10], as small changes easily cause it to now induce some other class. In this paper we  
27 study how to overcome such behavior by analyzing the *stability* of an explanation: we consider an  
28 explanation to be stable if once the explanatory features are included, the addition of more features  
29 does not change the prediction.

30 Stability implies that the selected features are enough to explain the prediction [11, 12, 13] and that this  
31 selection maintains strong explanatory power even in the presence of additional information [10, 14].  
32 Similar properties are studied in literature and identified as useful for interpretability [15], and we  
33 emphasize that our main focus is on analyzing and achieving provable guarantees. Stability guarantees  
34 in particular are useful as they allow one to accurately predict how model behavior varies with the  
35 explanation. Given a stable explanation, one can include more features, e.g. adding context, while  
36 maintaining confidence in the consistency of the underlying explanatory power. Crucially, we observe

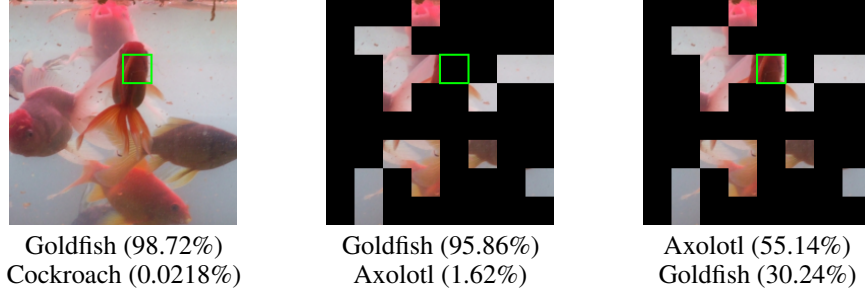

Figure 1: Classification by VisionTransformer [9] on an attribution generated by SHAP [7] with top-25% selection. A single  $28 \times 28$  pixel patch of difference between the two attributions (marked green) significantly affects prediction confidence and results in a classification flip.

that such guarantees only make sense when jointly considering the model and explanation method: the explanation method necessarily depends on the model to yield an explanation, and stability is then evaluated with respect to the model.

Thus far, existing work on feature attributions with formal guarantees face challenges with computational tractability and explanatory utility. While some methods take an axiomatic approach [8, 16], others use metrics that appear reasonable but may not reliably reflect useful model behavior, a common and known limitation [17]. Such explanations have been criticized as at best a plausible guess, and at worst completely misleading [18] about model behavior.

In this paper we study how to construct explainable models with provable stability guarantees. We jointly consider the classification model and explanation method, and present a formalization for studying such properties that we call *explainable models*. We focus on *binary feature attributions* [19] wherein each feature is either marked as explanatory (1) or not explanatory (0). We present a method to solve this problem, which is inspired by techniques from adversarial robustness, in particular randomized smoothing [20, 21]. Our method can take *any* off-the-shelf classifier and feature attribution method to efficiently yield an explainable model that satisfies provable stability guarantees. In summary, our contributions are as follows:

- We formalize stability as a key property for binary feature attributions and study this in the framework of explainable models. We prove that relaxed variants of stability are guaranteed if the model is sufficiently Lipschitz with respect to the masking of features.
- To achieve the sufficient Lipschitz conditions, we develop a smoothing method called Multiplicative Smoothing (MuS). We show that MuS achieves strong smoothness conditions, overcomes key theoretical and practical limitations of standard smoothing techniques, and can be integrated with any classifier and feature attribution method.
- We evaluate MuS on vision and language models along with different feature attribution methods. We demonstrate that MuS-smoothed explainable models achieve strong stability guarantees at a small cost to accuracy.

## 2 Overview

We observe that formal guarantees for explanations must take into account both the model and explanation method, and for this we present in Section 2.1 a pairing that we call *explainable models*. This formulation allows us to then describe the desired stability properties in Section 2.2. We show in Section 2.3 that classifiers with sufficient Lipschitz smoothness with respect to feature masking allows us to yield provable guarantees of stability. Finally in Section 2.4 we show how to adapt existing feature attribution methods into our explainable model framework.

### 2.1 Explainable Models

We first present explainable models as a formalism for rigorously studying explanations. Let  $\mathcal{X} = \mathbb{R}^n$  be the space of inputs, a classifier  $f : \mathcal{X} \rightarrow [0, 1]^m$  maps inputs  $x \in \mathcal{X}$  to  $m$  logits (class probabilities)

that sum to 1, where the class of  $f(x) \in [0, 1]^m$  is taken to be the largest coordinate. Similarly, an explanation method  $\varphi : \mathcal{X} \rightarrow \{0, 1\}^n$  maps an input  $x \in \mathcal{X}$  to an explanation  $\varphi(x) \in \{0, 1\}^n$  that indicates which features are considered explanatory for the prediction  $f(x)$ . In particular, we may pick and adapt  $\varphi$  from among a selection of existing feature attribution methods like LIME [6], SHAP [7], and many others [5, 8, 22, 23, 24], wherein  $\varphi$  may be thought of as a top- $k$  feature selector. Note that the selection of input features necessarily depends on the explanation method executing or analyzing the model, and so it makes sense to jointly study the model and explanation method: given a classifier  $f$  and explanation method  $\varphi$ , we call the pairing  $\langle f, \varphi \rangle$  an *explainable model*. Given some  $x \in \mathcal{X}$ , the explainable model  $\langle f, \varphi \rangle$  maps  $x$  to both a prediction and explanation. We show this in Figure 2, where  $\langle f, \varphi \rangle(x) \in [0, 1]^m \times \{0, 1\}^n$  pairs the class probabilities and the feature attribution.

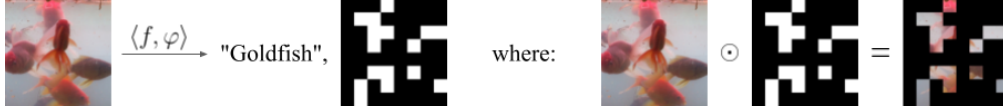

Figure 2: An explainable model  $\langle f, \varphi \rangle$  outputs both a classification and a feature attribution. The feature attribution is a binary-valued mask (white 1, black 0) that can be applied over the original input. Here  $f$  is Vision Transformer [9] and  $\varphi$  is SHAP [7] with top-25% feature selection.

For an input  $x \in \mathcal{X}$ , we will evaluate the quality of the binary feature attribution  $\varphi(x)$  through its masking on  $x$ . That is, we will study the behavior of  $f$  on the masked input  $x \odot \varphi(x) \in \mathcal{X}$ , where  $\odot$  is the element-wise vector product. To do this, we define a notion of *prediction equivalence*: for two  $x, x' \in \mathcal{X}$ , we write  $f(x) \cong f(x')$  to mean that  $f(x)$  and  $f(x')$  yield the same class. This allows us to formalize the intuition that an explanation  $\varphi(x)$  should recover the prediction of  $x$  under  $f$ .

**Definition 2.1.** The explainable model  $\langle f, \varphi \rangle$  is consistent at  $x$  if  $f(x) \cong f(x \odot \varphi(x))$ .

Evaluating  $f$  on  $x \odot \varphi(x)$  this way lets us apply the model as-is and therefore avoids the challenge of constructing a surrogate model that is accurate to the original [25]. Moreover, this approach is reasonable, especially in domains like vision — where one intuitively expects that a masked image retaining only the important features should induce the intended prediction. Indeed, architectures like Vision Transformer [9] can maintain high accuracy with only a fraction of the image present [26].

Particularly, we would like for  $\langle f, \varphi \rangle$  to generate explanations that are stable and concise (i.e. sparse). The former is our central guarantee, and is ensured through smoothing. The latter implies that  $\varphi(x)$  has few ones entries, and is a desirable property since a good explanation should not contain too much redundant information. However, sparsity is a difficult property to enforce, as this is contingent on the model having high accuracy with respect to heavily masked inputs. For sparsity we present a simple heuristic in Section 2.4 and evaluate its effectiveness in Section 4.

## 2.2 Stability Properties of Explainable Models

Given an explainable model  $\langle f, \varphi \rangle$  and some  $x \in \mathcal{X}$ , stability means that the prediction does not change even if one adds more explanatory features to  $\varphi(x)$ . For instance, the model-explanation pair in Figure 1 is *not* stable, as the inclusion of a single feature group (patch) changes the prediction. To formalize this notion of stability, we first introduce a partial ordering: for  $\alpha, \alpha' \in \{0, 1\}^n$ , we write  $\alpha \succeq \alpha'$  iff  $\alpha_i \geq \alpha'_i$  for all  $i = 1, \dots, n$ . That is,  $\alpha \succeq \alpha'$  iff  $\alpha$  includes all the features selected by  $\alpha'$ .

**Definition 2.2.** The explainable model  $\langle f, \varphi \rangle$  is stable at  $x$  if  $f(x \odot \alpha) \cong f(x \odot \varphi(x))$  for all  $\alpha \succeq \varphi(x)$ .

Note that the constant explanation  $\varphi(x) = \mathbf{1}$ , the vector of ones, makes  $\langle f, \varphi \rangle$  trivially stable at every  $x \in \mathcal{X}$ , though this is not a concise explanation. Additionally, stability at  $x$  implies consistency at  $x$ .

Unfortunately, stability is a difficult property to enforce in general, as it requires that  $f$  satisfy a monotone-like behavior with respect to feature inclusion — which is especially challenging for complex models like neural networks. Checking stability without additional assumptions on  $f$  is also hard: if  $k = \|\varphi(x)\|_1$  is the number of ones in  $\varphi(x)$ , then there are  $2^{n-k}$  possible  $\alpha \succeq \varphi(x)$  to check. This large space of possible  $\alpha \succeq \varphi(x)$  motivates us to instead examine *relaxations* of stability. We introduce lower and upper-relaxations of stability below.

**Definition 2.3.** The explainable model  $\langle f, \varphi \rangle$  is incrementally stable at  $x$  with radius  $r$  if  $f(x \odot \alpha) \cong f(x \odot \varphi(x))$  for all  $\alpha \succeq \varphi(x)$  where  $\|\alpha - \varphi(x)\|_1 \leq r$ .

Incremental stability is the lower-relaxation since it considers the case where the mask  $\alpha$  has only a few features more than  $\varphi(x)$ . For instance, if one can provably add up to  $r$  features to a masked  $x \odot \varphi(x)$  without altering the prediction, then  $\langle f, \varphi \rangle$  would be incremental stable at  $x$  with radius  $r$ . We next introduce the upper-relaxation that we call decremental stability.

**Definition 2.4.** *The explainable model  $\langle f, \varphi \rangle$  is decrementally stable at  $x$  with radius  $r$  if  $f(x \odot \alpha) \cong f(x \odot \varphi(x))$  for all  $\alpha \succeq \varphi(x)$  where  $\|\mathbf{1} - \alpha\|_1 \leq r$ .*

Decremental stability is a subtractive form of stability, in contrast to the additive nature of incremental stability. Particularly, decremental stability considers the case where  $\alpha$  has much more features than  $\varphi(x)$ . If one can provably remove up to  $r$  features from the full  $x$  without altering the prediction, then  $\langle f, \varphi \rangle$  is decrementally stable at  $x$  with radius  $r$ . Note also that decremental stability necessarily entails consistency of  $\langle f, \varphi \rangle$ , but for simplicity of definitions we do not enforce this for incremental stability. Furthermore, observe that for a sufficiently large radius of  $r = \lceil (n - \|\varphi(x)\|_1)/2 \rceil$ , incremental and decremental stability together imply stability.

**Remark 2.5.** *Similar notions to the above have been proposed in literature, and we refer to [15] for an extensive survey. In particular for [15], consistency is akin to preservation and stability is similar to continuity, except we are concerned with adding features. In this regard, incremental stability is most similar to incremental addition and decremental stability to incremental deletion.*

### 2.3 Lipschitz Smoothness Entails Stability Guarantees

If  $f : \mathcal{X} \rightarrow [0, 1]^m$  is Lipschitz with respect to the masking of features, then we can guarantee relaxed stability properties for the explainable model  $\langle f, \varphi \rangle$ . In particular, we require for all  $x \in \mathcal{X}$  that  $f(x \odot \alpha)$  is Lipschitz with respect to the mask  $\alpha \in \{0, 1\}^n$ . This then allows us to establish our main result (Theorem 3.3), which we preview below in Remark 2.6.

**Remark 2.6** (Sketch of main result). *Consider an explainable model  $\langle f, \varphi \rangle$  where for all  $x \in \mathcal{X}$  the function  $g(x, \alpha) = f(x \odot \alpha)$  is  $\lambda$ -Lipschitz in  $\alpha \in \{0, 1\}^n$  with respect to the  $\ell^1$  norm. Then at any  $x$ , the radius of incremental stability  $r_{\text{inc}}$  and radius of decremental stability  $r_{\text{dec}}$  are respectively:*

$$r_{\text{inc}} = \frac{g_A(x, \varphi(x)) - g_B(x, \varphi(x))}{2\lambda}, \quad r_{\text{dec}} = \frac{g_A(x, \mathbf{1}) - g_B(x, \mathbf{1})}{2\lambda},$$

where  $g_A - g_B$  is referred to as the logit gap, with  $g_A, g_B$  the first and second-largest logits:

$$k^* = \operatorname{argmax}_{1 \leq k \leq m} g_k(x, \alpha), \quad g_A(x, \alpha) = g_{k^*}(x, \alpha), \quad g_B(x, \alpha) = \max_{i \neq k^*} g_i(x, \alpha). \quad (1)$$

Observe that Lipschitz smoothness is in fact a stronger assumption than necessary, as besides  $\alpha \succeq \varphi(x)$  it also imposes guarantees on  $\alpha \preceq \varphi(x)$ . Nevertheless, Lipschitz smoothness is one of the few classes of properties that can be guaranteed and analyzed at scale on arbitrary models [21, 27].

### 2.4 Adapting Existing Feature Attribution Methods

Most existing feature attribution methods assign a real-valued score to feature importance, rather than a binary value. We therefore need to convert this to a binary-valued method for use with a stable explainable model. Let  $\psi : \mathcal{X} \rightarrow \mathbb{R}^n$  be such a continuous-valued method like LIME [6] or SHAP [7], and fix some desired incremental stability radius  $r_{\text{inc}}$  and decremental stability radius  $r_{\text{dec}}$ . Given some  $x \in \mathcal{X}$  a simple construction for binary  $\varphi(x) \in \{0, 1\}^n$  is described next.

**Remark 2.7** (Iterative construction of  $\varphi(x)$ ). *Consider any  $x \in \mathcal{X}$  and let  $\rho$  be an index ordering on  $\psi(x)$  from high-to-low (i.e. largest logit first). Initialize  $\alpha = \mathbf{0}$ , and for each  $i \in \rho$ : assign  $\alpha_i \leftarrow 1$  then check whether  $\langle f, \varphi : x \mapsto \alpha \rangle$  is now consistent, incrementally stable with radius  $r_{\text{inc}}$ , and decrementally stable with radius  $r_{\text{dec}}$ . If so then terminate with  $\varphi(x) = \alpha$ ; otherwise continue.*

Note that the above method of constructing  $\varphi(x)$  does not impose sparsity guarantees in the way that we may guarantee stability through Lipschitz smoothness. Instead, the ordering from a continuous-valued  $\psi(x)$  serves as a greedy heuristic for constructing  $\varphi(x)$ . We show in Section 4 that some feature attributions (e.g. SHAP [7]) tend to yield sparser selections on average compared to others (e.g. Vanilla Gradient Saliency [5]).

### 3 Multiplicative Smoothing for Lipschitz Constants

In this section we present our main technical contribution in Multiplicative Smoothing (MuS). The goal is to transform an arbitrary base classifier  $h : \mathcal{X} \rightarrow [0, 1]^m$  into a smoothed classifier  $f : \mathcal{X} \rightarrow [0, 1]^m$  that is Lipschitz with respect to the masking of features. This then allows one to appropriately couple an explanation method  $\varphi$  with  $f$  in order to form an explainable model  $\langle f, \varphi \rangle$  with provable stability guarantees.

We give an overview of our MuS in Section 3.1, where we illustrate a principal motivation for its development is because standard smoothing techniques may violate an property that we call *masking equivalence*. We present the Lipschitz constant of the smoothed classifier  $f$  in Section 3.2 and show how this is used to certify stability. Finally we give an efficient computation of MuS in Section 3.3, allowing us to exactly evaluate  $f$  at a low sample complexity.

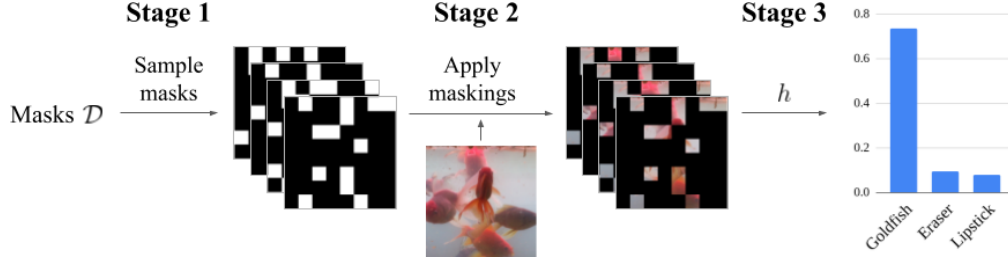

Figure 3: Evaluating  $f(x)$  is done in three stages. **(Stage 1)** Generate  $N$  samples of binary masks  $s^{(1)}, \dots, s^{(N)} \in \{0, 1\}^n$ , where each coordinate is Bernoulli with parameter  $\lambda$  (here  $\lambda = 1/4$ ). **(Stage 2)** Apply each mask on the input to yield  $x \odot s^{(i)}$  for  $i = 1, \dots, N$ . **(Stage 3)** Average over  $h(x \odot s^{(i)})$  to compute  $f(x)$ , and note that the predicted class is given by a weighted average.

#### 3.1 Technical Overview of MuS

Our key insight is that randomly dropping (i.e. zeroing) features attains the desired smoothness. In particular, we uniformly drop features with probability  $1 - \lambda$  by sampling binary masks  $s \in \{0, 1\}^n$  from some distribution  $\mathcal{D}$  where each coordinate is distributed as  $\Pr[s_i = 1] = \lambda$ . Then define  $f$  as:

$$f(x) = \mathbb{E}_{s \sim \mathcal{D}} h(x \odot s), \quad \text{such that } s_i \sim \mathcal{B}(\lambda) \text{ for } i = 1, \dots, n \quad (2)$$

where  $\mathcal{B}(\lambda)$  is the Bernoulli distribution with parameter  $\lambda \in [0, 1]$ . We give an overview of evaluating  $f(x)$  in Figure 3. Importantly, our main results (Theorem 3.2, Theorem 3.3) hold provided  $\mathcal{D}$  is coordinate-wise Bernoulli with  $\lambda$ , and so we avoid restricting ourselves to any one particular choice until necessary. However, it will be easy to intuit the exposition with  $\mathcal{D} = \mathcal{B}^n(\lambda)$ , the coordinate-wise i.i.d. Bernoulli distribution with  $\lambda$ .

We can equivalently parametrize  $f$  using the mapping  $g(x, \alpha) = f(x \odot \alpha)$ , where it follows that:

$$g(x, \alpha) = \mathbb{E}_{s \sim \mathcal{D}} h(x \odot \tilde{\alpha}), \quad \tilde{\alpha} = \alpha \odot s. \quad (3)$$

Note that one could have alternatively first defined  $g$  and then  $f$  due to the identity  $g(x, \mathbf{1}) = f(x)$ . We require that the relationship between  $f$  and  $g$  follows an identity that we call *masking equivalence*:

$$g(x \odot \alpha, \mathbf{1}) = f(x \odot \alpha) = g(x, \alpha), \quad \text{for all } x \in \mathcal{X} \text{ and } \alpha \in \{0, 1\}^n. \quad (4)$$

This follows by definition of  $g$ , and the relevance to stability is this: if masking equivalence holds, then we can rewrite stability properties involving  $f$  in terms of  $g$ 's second parameter as follows:

$$f(x \odot \alpha) = g(x, \alpha) \cong g(x, \varphi(x)) = f(x \odot \varphi(x)), \quad \text{for all } \alpha \succeq \varphi(x), \quad (\text{c.f. Definition 2.2})$$

where incremental and decremental stability may be analogously defined. This translation is useful, as we will prove that  $g$  is  $\lambda$ -Lipschitz in its second parameter (Theorem 3.2), which then allows us to establish the desired stability properties (Theorem 3.3).

Observe that we have not given an exact construction for  $\mathcal{D}$ , since many choices are in fact valid. Rather, so long as each coordinate of  $s \sim \mathcal{D}$  obeys  $s_i \sim \mathcal{B}(\lambda)$  then the Lipschitz properties for  $g$

192 follow. The implication here is that although simple distributions like  $\mathcal{B}^n(\lambda)$  suffices for  $\mathcal{D}$ , they may  
 193 not be sample efficient. We show in Section 3.3 how to exploit a structured statistical dependence in  
 194 order to reduce the sample complexity of computing MuS.

195 Importantly, we are motivated to develop MuS because standard smoothing techniques, namely  
 196 additive smoothing [20, 21], may fail to satisfy masking equivalence. Additive smoothing is by far  
 197 the most popular smoothing technique, and differs from our scheme (3) in how noise is applied,  
 198 where let  $\mathcal{D}_{\text{add}}$  and  $\mathcal{D}_{\text{mult}}$  be any two distributions on  $\mathbb{R}^n$ :

$$g(x, \alpha) = \mathbb{E}_{s \sim \mathcal{D}} h(x \odot \tilde{\alpha}), \quad \tilde{\alpha} = \begin{cases} \alpha + s, & s \sim \mathcal{D}_{\text{add}}, & \text{additive noise} \\ \alpha \odot s, & s \sim \mathcal{D}_{\text{mult}}, & \text{multiplicative noise} \end{cases}$$

199 Particularly, additive smoothing has counterexamples to masking equivalence.

200 **Proposition 3.1.** *There exists  $h : \mathcal{X} \rightarrow [0, 1]$  and distribution  $\mathcal{D}$ , where for*

$$g^+(x, \alpha) = \mathbb{E}_{s \sim \mathcal{D}} h(x \odot \tilde{\alpha}), \quad \tilde{\alpha} = \alpha + s,$$

201 *we have  $g^+(x, \alpha) \neq g^+(x \odot \alpha, \mathbf{1})$  for some  $x \in \mathcal{X}$  and  $\alpha \in \{0, 1\}^n$ .*

202 *Proof.* Observe that it suffices to have  $h, x, \alpha$  such that  $h(x \odot (\alpha + s)) > h((x \odot \alpha) \odot (\mathbf{1} + s))$  for  
 203 a non-empty set of  $s \in \mathbb{R}^n$ . Let  $\mathcal{D}$  be a distribution on these  $s$ , then:

$$g^+(x, \alpha) = \mathbb{E}_{s \sim \mathcal{D}} h(x \odot (\alpha + s)) > \mathbb{E}_{s \sim \mathcal{D}} h((x \odot \alpha) \odot (\mathbf{1} + s)) = g^+(x \odot \alpha, \mathbf{1})$$

204

□

205 Intuitively, this occurs because additive smoothing primarily applies noise by perturbing feature  
 206 values, rather than completely masking them. As such, there might be “information leakage” when  
 207 non-explanatory bits of  $\alpha$  are changed into non-zero values. This then causes each sample of  $h(x \odot \tilde{\alpha})$   
 208 within  $g(x, \alpha)$  to observe more features of  $x$  than it would have been able to otherwise.

### 209 3.2 Certifying Stability Properties with Lipschitz Classifiers

210 Our core technical result is in showing that  $f$  as defined in (2) is Lipschitz to the masking of features.  
 211 We present MuS in terms of  $g$ , where it is parametric with respect to the distribution  $\mathcal{D}$ : so long as  $\mathcal{D}$   
 212 satisfies a coordinate-wise Bernoulli condition, then it is usable with MuS.

213 **Theorem 3.2 (MuS).** *Let  $\mathcal{D}$  be any distribution on  $\{0, 1\}^n$  where each coordinates of  $s \sim \mathcal{D}$  is*  
 214 *distributed as  $s_i \sim \mathcal{B}(\lambda)$ . Consider any  $h : \mathcal{X} \rightarrow [0, 1]$  and define  $g : \mathcal{X} \times \{0, 1\}^n \rightarrow [0, 1]$  as*

$$g(x, \alpha) = \mathbb{E}_{s \sim \mathcal{D}} h(x \odot \tilde{\alpha}), \quad \tilde{\alpha} = \alpha \odot s.$$

215 *Then the function  $g(x, \cdot) : \{0, 1\}^n \rightarrow [0, 1]$  is  $\lambda$ -Lipschitz in the  $\ell^1$  norm for all  $x \in \mathcal{X}$ .*

216 The strength of this result is in its weak assumptions. First, the theorem applies to any model  $h$  and  
 217 input  $x \in \mathcal{X}$ . It further suffices that each coordinate is distributed as  $s_i \sim \mathcal{B}(\lambda)$ , and we emphasize  
 218 that statistical independence between different  $s_i, s_j$  is *not assumed*. This allows us to construct  
 219  $\mathcal{D}$  with structured dependence in Section 3.3, such that we may exactly and efficiently evaluate  
 220  $g(x, \alpha)$  at a sample complexity of  $N \ll 2^n$ . A low sample complexity is important for making MuS  
 221 practically usable, as otherwise one must settle for of the expected value subject to probabilistic  
 222 guarantees. For instance, simpler distributions like  $\mathcal{B}^n(\lambda)$  do in fact satisfy the requirements of  
 223 Theorem 3.2 — but costs  $2^n$  samples because of coordinate-wise independence.

224 Whatever choice of  $\mathcal{D}$ , one can guarantee stability so long as  $g$  is Lipschitz in its second argument.

225 **Theorem 3.3 (Stability).** *Consider any  $h : \mathcal{X} \rightarrow [0, 1]^m$  with coordinates  $h_1, \dots, h_m$ . Fix  $\lambda \in [0, 1]$*   
 226 *and let  $g_1, \dots, g_m$  be the respectively smoothed coordinates as in Theorem 3.2, using which we*  
 227 *analogously define  $g : \mathcal{X} \times \{0, 1\}^n \rightarrow [0, 1]^m$ . Also define  $f(x) = g(x, \mathbf{1})$ . Then for any explanation*  
 228 *method  $\varphi$  and input  $x \in \mathcal{X}$ , the explainable model  $\langle f, \varphi \rangle$  is incrementally stable with radius  $r_{\text{inc}}$  and*  
 229 *decrementally stable with radius  $r_{\text{dec}}$ :*

$$r_{\text{inc}} = \frac{g_A(x, \varphi(x)) - g_B(x, \varphi(x))}{2\lambda}, \quad r_{\text{dec}} = \frac{g_A(x, \mathbf{1}) - g_B(x, \mathbf{1})}{2\lambda},$$

230 *where  $g_A, g_B$  are the first and second largest logits of  $g$  as in (1).*

231 Note that it is only in the case where the radius  $\geq 1$  do non-trivial stability guarantees exist. Because  
 232 each  $g_k$  has range in  $[0, 1]$ , this means that a Lipschitz constant of  $\lambda \leq 1/2$  is necessary to attain at  
 233 least one radius of stability. We present in Appendix A.2 some extensions to MuS that allows one to  
 234 achieve higher coverage of features.

### 235 3.3 Exploiting Structured Dependency

236 We now present  $\mathcal{L}_{qv}(\lambda)$ , a distribution on  $\{0, 1\}^n$  that allows for efficient and exact evaluation of a  
 237 MuS-smoothed classifier. Our construction is an adaption of [27] from uniform to Bernoulli noise,  
 238 where the primary insight is that one can parametrize  $n$ -dimensional noise using a single dimension  
 239 via structured coordinate-wise dependence. In particular, we use a *seed vector*  $v$ , where with an  
 240 integer *quantization parameter*  $q > 1$  there will only exist  $q$  distinct choices of  $s \sim \mathcal{L}_{qv}(\lambda)$ . All  
 241 the while, we still enforce that any such  $s$  is coordinate-wise Bernoulli with  $s_i \sim \mathcal{B}(\lambda)$ . Thus for a  
 242 sufficiently small quantization parameter (i.e.  $q \ll 2^n$ ) we may tractably enumerate through all  $q$   
 243 possible choices of  $s$  and thereby evaluate a MuS-smoothed model with only  $q$  samples.

244 **Proposition 3.4.** Fix integer  $q > 1$  and consider any vector  $v \in \{0, 1/q, \dots, (q-1)/q\}^n$  and scalar  
 245  $\lambda \in \{1/q, \dots, q/q\}$ . Define  $s \sim \mathcal{L}_{qv}(\lambda)$  to be a random vector in  $\{0, 1\}^n$  with coordinates given by

$$s_i = \mathbb{I}[t_i \leq \lambda], \quad t_i = v_i + s_{\text{base}} \bmod 1, \quad s_{\text{base}} \sim \mathcal{U}(\{1/q, \dots, q/q\}) - 1/(2q).$$

246 Then there are  $q$  distinct values of  $s$  and each coordinate is distributed as  $s_i \sim \mathcal{B}(\lambda)$ .

247 *Proof.* First, observe that each of the  $q$  distinct values of  $s_{\text{base}}$  defines a unique value of  $s$ , since  
 248 we have assumed  $v$  and  $\lambda$  to be fixed. Next, observe that each  $t_i$  has  $q$  unique values uniformly  
 249 distributed as  $t_i \sim \mathcal{U}(1/q, \dots, q/q) - 1/(2q)$ . Because  $\lambda \in \{1/q, \dots, q/q\}$  we therefore have  
 250  $\Pr[t_i \leq \lambda] = \lambda$ , which implies that  $s_i \sim \mathcal{B}(\lambda)$ .  $\square$

251 The seed vector  $v$  is the source of our structured coordinate-wise dependence and the one-dimensional  
 252 source of randomness  $s_{\text{base}}$  is used to generate the  $n$ -dimensional  $s$ . Such  $s \sim \mathcal{L}_{qv}(\lambda)$  then satisfies  
 253 the conditions for use in MuS (Theorem 3.2), and this noise allows for an exact evaluation of the  
 254 smoothed classifier in  $q$  samples. We have found  $q = 64$  to be sufficient in practice and values as  
 255 low as  $q = 16$  to also yield good performance. We remark that one drawback is that one may get an  
 256 unlucky seed  $v$ , but we have not yet observed this in our experiments.

## 257 4 Empirical Evaluations

258 We evaluate the quality of MuS on different classification models and explanation methods as they  
 259 relate to stability guarantees. To that end, we perform the following experiments.

260 **(E1) How good are the stability guarantees?** There exists a natural measure of quality for stability  
 261 guarantees over a dataset: what radii are achieved, and at what frequency. We investigate how  
 262 different combinations of models, explanation methods, and  $\lambda$  affect this measure.

263 **(E2) What is the cost of smoothing?** To increase the radius of a provable stability guarantee, we  
 264 must decrease the Lipschitz constant  $\lambda$ . As  $\lambda$  decreases, however, more features are dropped during  
 265 the smoothing process. This experiment investigates this stability-accuracy trade-off.

266 **(E3) Which explanation method is best?** We evaluate which existing feature attribution methods  
 267 are amenable to strong stability guarantees. We examine LIME [6], SHAP [7], Vanilla Gradient  
 268 Saliency (VGrad) [5], and Integrated Gradients (IGrad) [8], with focus on the size of the explanation.

269 **(Experimental Setup)** We use on two vision models (Vision Transformer [9] and ResNet50 [28])  
 270 and one language model (RoBERTa [29]). For the vision dataset we use ImageNet1K [30] and  
 271 for the language dataset we use TweetEval [31] sentiment analysis. We use *feature grouping* from  
 272 Appendix A.2.1 on ImageNet1K to reduce the  $3 \times 224 \times 224$  dimensional input into  $n = 64$  superpixel  
 273 patches. We report stability radii  $r$  in terms of fraction of features, i.e.  $r/n$ . In all our experiments  
 274 we use the quantized noise as in Section 3.3 with  $q = 64$  unless specified otherwise. We refer to  
 275 Appendix B for training details and the comprehensive experiments.

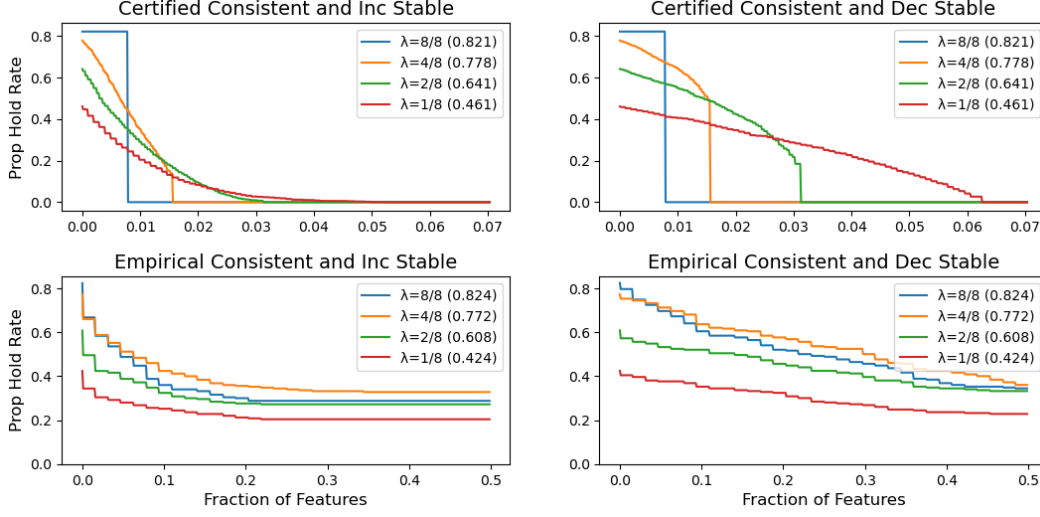

Figure 4: Rate of consistency and incremental (decremental) stability up to radius  $r$  vs. fraction of feature coverage  $r/n$ . Left: certified  $N_{\text{cert}} = 2000$ ; Right: empirical  $N_{\text{emp}} = 250$  with  $q = 16$ .

#### 276 4.1 (E1) Quality of Stability Guarantees

277 We study how much radius of consistent and incremental (resp. decremental) stability is achieved,  
 278 and how often. We take an explainable model  $\langle f, \varphi \rangle$  where  $f$  is Vision Transformer and  $\varphi$  is SHAP  
 279 with top-25% feature selection. We plot the rate at which a property holds (e.g. consistent and  
 280 incrementally stable with radius  $r$ ) as a function of radius (expressed as a fraction of features  $r/n$ ).

281 We show our results in Figure 4, where on the left we have the certified guarantees for  $N_{\text{cert}} = 2000$   
 282 samples from ImageNet1K; on the right we have the empirical radii for  $N_{\text{emp}} = 250$  samples  
 283 obtained by applying a standard box attack [32] strategy with  $q = 16$ . We observe for the certified  
 284 results that the decremental stability have larger radii than the incremental stability. This is reasonable  
 285 since the base classifier sees much more of the input when analyzing decremental stability, and can  
 286 therefore be more confident on average, i.e. achieve a larger logit gap. Moreover, our empirical radii  
 287 often cover up to half of the input, which suggests that our certified analysis is quite conservative.

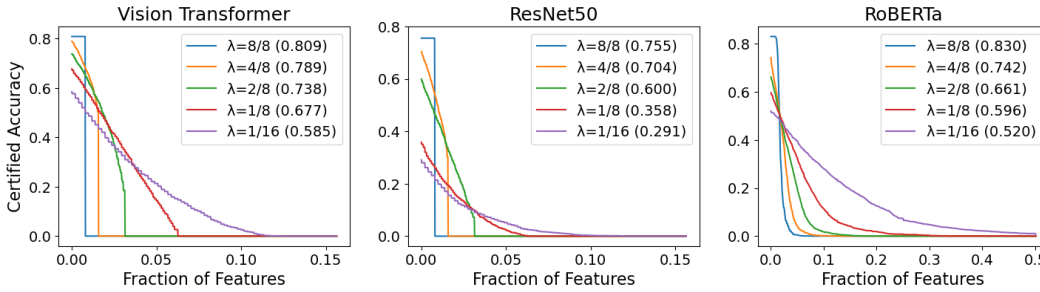

Figure 5: Certified accuracy vs. decremental stability radius.  $N = 2000$ .

#### 288 4.2 (E2) Stability-Accuracy Trade-Offs

289 We next investigate how smoothing impacts the classifier accuracy. As  $\lambda$  decreases due to more  
 290 smoothing, the base classifier sees increasingly zeroed out features — which should hurt accuracy.  
 291 We took  $N = 2000$  samples for each classifier on their respective datasets and plotted the certified  
 292 accuracy vs. radius of decremental stability.

293 We show the results in Figure 5, where as expected the clean accuracy (in parentheses) decreases with  
 294  $\lambda$ . This accuracy drop is especially pronounced for ResNet50, and we suspect that the transformer



architecture of Vision Transformer and RoBERTa make them more resilient to the randomized masking of features. Nevertheless, this experiment demonstrates that large models, especially transformers, can tolerate non-trivial noise from MuS while maintaining high accuracy.

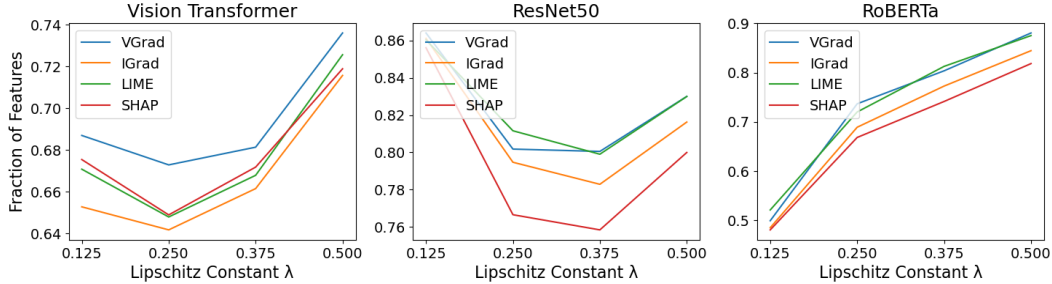

Figure 6: Average  $k/n$  vs.  $\lambda$ , where  $k = \|\varphi(x)\|_1$  is the number of features for  $\langle f, \varphi \rangle$  to be consistent, incrementally stable with radius 1, and decrementally stable with radius 1.  $N = 250$ .

### 4.3 (E3) Which Explanation Method to Pick?

Finally, we explore which feature attribution method is best suited to stability guarantees of explainable model  $\langle f, \varphi \rangle$ . All four methods  $\psi \in \{\text{LIME}, \text{SHAP}, \text{VGrad}, \text{IGrad}\}$  are continuous-valued, for which we samples  $N = 250$  inputs from each model’s respective dataset. For each input  $x$  we use the feature importance ranking generated by  $\psi(x)$  to iteratively build  $\varphi(x)$  in a greedy manner like in Section 2.4. For some  $x$ , let  $k_x = \varphi(x)/n$  be the number fraction of features needed for  $\langle f, \varphi \rangle$  to be consistent, incrementally stable with radius 1, and decrementally stable with radius 1. We then plot the average  $k_x$  for different methods at  $\lambda \in \{1/8, \dots, 4/8\}$  in Figure 6, where note that SHAP tends to require fewer features to achieve the desired properties, while VGrad tends to require more. However, we do not believe these to be decisive results, as many curves are relatively close, especially for Vision Transformer and ResNet50.

## 5 Related Works

For extensive surveys on explainability methods see [15, 19, 33, 34, 35, 36, 37]. Notable feature attribution methods include Vanilla Gradient Saliency [5], SmoothGrad [22], Integrated Gradients [8], Grad-CAM [38], Occlusion [39], LIME [6], SHAP [7], and their variants. Of these, Shapley valued [16] based methods [7, 23, 24] are rooted in axiomatic principles, as are Integrated Gradients [8, 40]. The work of [41] finds confidence intervals over attribution scores. A study of common feature attribution methods is done in [42]. Similar to our approach is [43], which studies binary-valued classifiers and presents an algorithm with succinctness and probabilistic precision guarantees. Different metrics for evaluating feature attributions are studied in [15, 17, 44, 45, 46, 47, 48, 49, 50]. Whether an attribution correctly identifies relevant features is a well-known issue [51, 52]. Many methods are also susceptible to adversarial attacks [53, 54]. As a negative result, [55] shows that feature attributions have provably poor performance on sufficiently rich model classes. Related to feature attributions are *data attributions* [56, 57, 58], which assigns values to training data points.

## 6 Conclusion

We study provable stability guarantees for binary feature attribution methods through the framework of explainable models. A selection of features is stable if the additional inclusion of other features do not alter its explanatory power. We show that if the classifier is Lipschitz with respect to the masking of features, then one can guarantee relaxed variants of stability. To achieve this Lipschitz condition we develop a smoothing method called Multiplicative Smoothing (MuS). This method is parametric to the choice of noise distribution, allowing us to construct and exploit distributions with structured dependence for exact and efficient evaluation. We evaluate MuS on vision and language models, and demonstrate that MuS yields strong stability guarantees at only a small cost to accuracy.

## References

- [1] Mauricio Reyes, Raphael Meier, Sérgio Pereira, Carlos A Silva, Fried-Michael Dahlweid, Hendrik von Tengg-Koblogk, Ronald M Summers, and Roland Wiest. On the interpretability of artificial intelligence in radiology: challenges and opportunities. *Radiology: artificial intelligence*, 2(3):e190043, 2020.
- [2] Erico Tjoa and Cuntai Guan. A survey on explainable artificial intelligence (xai): Toward medical xai. *IEEE transactions on neural networks and learning systems*, 32(11):4793–4813, 2020.
- [3] Sandra Wachter, Brent Mittelstadt, and Chris Russell. Counterfactual explanations without opening the black box: Automated decisions and the gdpr. *Harv. JL & Tech.*, 31:841, 2017.
- [4] Adrien Bibal, Michael Lognoul, Alexandre De Streel, and Benoît Frénay. Legal requirements on explainability in machine learning. *Artificial Intelligence and Law*, 29:149–169, 2021.
- [5] Karen Simonyan, Andrea Vedaldi, and Andrew Zisserman. Deep inside convolutional networks: Visualising image classification models and saliency maps. *arXiv preprint arXiv:1312.6034*, 2013.
- [6] Marco Tulio Ribeiro, Sameer Singh, and Carlos Guestrin. " why should i trust you?" explaining the predictions of any classifier. In *Proceedings of the 22nd ACM SIGKDD international conference on knowledge discovery and data mining*, pages 1135–1144, 2016.
- [7] Scott M Lundberg and Su-In Lee. A unified approach to interpreting model predictions. *Advances in neural information processing systems*, 30, 2017.
- [8] Mukund Sundararajan, Ankur Taly, and Qiqi Yan. Axiomatic attribution for deep networks. In *International conference on machine learning*, pages 3319–3328. PMLR, 2017.
- [9] Alexey Dosovitskiy, Lucas Beyer, Alexander Kolesnikov, Dirk Weissenborn, Xiaohua Zhai, Thomas Unterthiner, Mostafa Dehghani, Matthias Minderer, Georg Heigold, Sylvain Gelly, et al. An image is worth 16x16 words: Transformers for image recognition at scale. *arXiv preprint arXiv:2010.11929*, 2020.
- [10] Amirata Ghorbani, Abubakar Abid, and James Zou. Interpretation of neural networks is fragile. In *Proceedings of the AAAI conference on artificial intelligence*, volume 33, pages 3681–3688, 2019.
- [11] Gavin Brown. A new perspective for information theoretic feature selection. In *Artificial intelligence and statistics*, pages 49–56. PMLR, 2009.
- [12] Jianbo Chen, Le Song, Martin Wainwright, and Michael Jordan. Learning to explain: An information-theoretic perspective on model interpretation. In *International Conference on Machine Learning*, pages 883–892. PMLR, 2018.
- [13] Xiaoping Li, Yadi Wang, and Rubén Ruiz. A survey on sparse learning models for feature selection. *IEEE transactions on cybernetics*, 52(3):1642–1660, 2020.
- [14] Akhilan Boopathy, Sijia Liu, Gaoyuan Zhang, Cynthia Liu, Pin-Yu Chen, Shiyu Chang, and Luca Daniel. Proper network interpretability helps adversarial robustness in classification. In *International Conference on Machine Learning*, pages 1014–1023. PMLR, 2020.
- [15] Meike Nauta, Jan Trienes, Shreyasi Pathak, Elisa Nguyen, Michelle Peters, Yasmin Schmitt, Jörg Schlötterer, Maurice van Keulen, and Christin Seifert. From anecdotal evidence to quantitative evaluation methods: A systematic review on evaluating explainable ai. *arXiv preprint arXiv:2201.08164*, 2022.
- [16] L.S. Shapley. A value for n-person games. *Contributions to the Theory of Games*, pages 307–317, 1953.
- [17] Yilun Zhou, Serena Booth, Marco Tulio Ribeiro, and Julie Shah. Do feature attribution methods correctly attribute features? In *Proceedings of the AAAI Conference on Artificial Intelligence*, volume 36, pages 9623–9633, 2022.

- [18] Alon Jacovi and Yoav Goldberg. Towards faithfully interpretable nlp systems: How should we define and evaluate faithfulness? In *Proceedings of the 58th Annual Meeting of the Association for Computational Linguistics*, pages 4198–4205, 2020.
- [19] Jundong Li, Kewei Cheng, Suhan Wang, Fred Morstatter, Robert P Trevino, Jiliang Tang, and Huan Liu. Feature selection: A data perspective. *ACM computing surveys (CSUR)*, 50(6):1–45, 2017.
- [20] Jeremy Cohen, Elan Rosenfeld, and Zico Kolter. Certified adversarial robustness via randomized smoothing. In *International Conference on Machine Learning*, pages 1310–1320. PMLR, 2019.
- [21] Greg Yang, Tony Duan, J Edward Hu, Hadi Salman, Ilya Razenshteyn, and Jerry Li. Randomized smoothing of all shapes and sizes. In *International Conference on Machine Learning*, pages 10693–10705. PMLR, 2020.
- [22] Daniel Smilkov, Nikhil Thorat, Been Kim, Fernanda Viégas, and Martin Wattenberg. Smoothgrad: removing noise by adding noise. *arXiv preprint arXiv:1706.03825*, 2017.
- [23] Mukund Sundararajan and Amir Najmi. The many shapley values for model explanation. In *International conference on machine learning*, pages 9269–9278. PMLR, 2020.
- [24] Yongchan Kwon and James Zou. Weightedshap: analyzing and improving shapley based feature attributions. *arXiv preprint arXiv:2209.13429*, 2022.
- [25] Reza Alizadeh, Janet K Allen, and Farrokh Mistree. Managing computational complexity using surrogate models: a critical review. *Research in Engineering Design*, 31:275–298, 2020.
- [26] Hadi Salman, Saachi Jain, Eric Wong, and Aleksander Madry. Certified patch robustness via smoothed vision transformers. In *Proceedings of the IEEE/CVF Conference on Computer Vision and Pattern Recognition*, pages 15137–15147, 2022.
- [27] Alexander J Levine and Soheil Feizi. Improved, deterministic smoothing for l<sub>1</sub> certified robustness. In *International Conference on Machine Learning*, pages 6254–6264. PMLR, 2021.
- [28] Kaiming He, Xiangyu Zhang, Shaoqing Ren, and Jian Sun. Deep residual learning for image recognition. In *Proceedings of the IEEE conference on computer vision and pattern recognition*, pages 770–778, 2016.
- [29] Yinhan Liu, Myle Ott, Naman Goyal, Jingfei Du, Mandar Joshi, Danqi Chen, Omer Levy, Mike Lewis, Luke Zettlemoyer, and Veselin Stoyanov. Roberta: A robustly optimized bert pretraining approach. *arXiv preprint arXiv:1907.11692*, 2019.
- [30] Olga Russakovsky, Jia Deng, Hao Su, Jonathan Krause, Sanjeev Satheesh, Sean Ma, Zhiheng Huang, Andrej Karpathy, Aditya Khosla, Michael Bernstein, et al. Imagenet large scale visual recognition challenge. *International journal of computer vision*, 115:211–252, 2015.
- [31] Francesco Barbieri, Jose Camacho-Collados, Leonardo Neves, and Luis Espinosa-Anke. Tweeteval: Unified benchmark and comparative evaluation for tweet classification. *arXiv preprint arXiv:2010.12421*, 2020.
- [32] Pin-Yu Chen, Huan Zhang, Yash Sharma, Jinfeng Yi, and Cho-Jui Hsieh. Zoo: Zeroth order optimization based black-box attacks to deep neural networks without training substitute models. In *Proceedings of the 10th ACM workshop on artificial intelligence and security*, pages 15–26, 2017.
- [33] Nadia Burkart and Marco F Huber. A survey on the explainability of supervised machine learning. *Journal of Artificial Intelligence Research*, 70:245–317, 2021.
- [34] Jianlong Zhou, Amir H Gandomi, Fang Chen, and Andreas Holzinger. Evaluating the quality of machine learning explanations: A survey on methods and metrics. *Electronics*, 10(5):593, 2021.
- [35] Qing Lyu, Marianna Apidianaki, and Chris Callison-Burch. Towards faithful model explanation in nlp: A survey. *arXiv preprint arXiv:2209.11326*, 2022.

- [36] Xuhong Li, Haoyi Xiong, Xingjian Li, Xuanyu Wu, Xiao Zhang, Ji Liu, Jiang Bian, and Dejing Dou. Interpretable deep learning: Interpretation, interpretability, trustworthiness, and beyond. *Knowledge and Information Systems*, 64(12):3197–3234, 2022.
- [37] Rishi Bommasani, Drew A Hudson, Ehsan Adeli, Russ Altman, Simran Arora, Sydney von Arx, Michael S Bernstein, Jeannette Bohg, Antoine Bosselut, Emma Brunskill, et al. On the opportunities and risks of foundation models. *arXiv preprint arXiv:2108.07258*, 2021.
- [38] Ramprasaath R Selvaraju, Michael Cogswell, Abhishek Das, Ramakrishna Vedantam, Devi Parikh, and Dhruv Batra. Grad-cam: Visual explanations from deep networks via gradient-based localization. In *Proceedings of the IEEE international conference on computer vision*, pages 618–626, 2017.
- [39] Matthew D Zeiler and Rob Fergus. Visualizing and understanding convolutional networks. In *Computer Vision—ECCV 2014: 13th European Conference, Zurich, Switzerland, September 6–12, 2014, Proceedings, Part I 13*, pages 818–833. Springer, 2014.
- [40] Daniel D Lundstrom, Tianjian Huang, and Meisam Razaviyayn. A rigorous study of integrated gradients method and extensions to internal neuron attributions. In *International Conference on Machine Learning*, pages 14485–14508. PMLR, 2022.
- [41] Dylan Slack, Anna Hilgard, Sameer Singh, and Himabindu Lakkaraju. Reliable post hoc explanations: Modeling uncertainty in explainability. *Advances in neural information processing systems*, 34:9391–9404, 2021.
- [42] Tessa Han, Suraj Srinivas, and Himabindu Lakkaraju. Which explanation should i choose? a function approximation perspective to characterizing post hoc explanations. *arXiv preprint arXiv:2206.01254*, 2022.
- [43] Guy Blanc, Jane Lange, and Li-Yang Tan. Provably efficient, succinct, and precise explanations. *Advances in Neural Information Processing Systems*, 34:6129–6141, 2021.
- [44] Julius Adebayo, Justin Gilmer, Michael Muelly, Ian Goodfellow, Moritz Hardt, and Been Kim. Sanity checks for saliency maps. *Advances in neural information processing systems*, 31, 2018.
- [45] Sara Hooker, Dumitru Erhan, Pieter-Jan Kindermans, and Been Kim. A benchmark for interpretability methods in deep neural networks. *Advances in neural information processing systems*, 32, 2019.
- [46] Jay DeYoung, Sarthak Jain, Nazneen Fatema Rajani, Eric Lehman, Caiming Xiong, Richard Socher, and Byron C Wallace. Eraser: A benchmark to evaluate rationalized nlp models. *arXiv preprint arXiv:1911.03429*, 2019.
- [47] Jasmijn Bastings, Sebastian Ebert, Polina Zablotskaia, Anders Sandholm, and Katja Filippova. "will you find these shortcuts?" a protocol for evaluating the faithfulness of input salience methods for text classification. *arXiv preprint arXiv:2111.07367*, 2021.
- [48] Yao Rong, Tobias Leemann, Vadim Borisov, Gjergji Kasneci, and Enkelejda Kasneci. A consistent and efficient evaluation strategy for attribution methods. *arXiv preprint arXiv:2202.00449*, 2022.
- [49] Yilun Zhou and Julie Shah. The solvability of interpretability evaluation metrics. *arXiv preprint arXiv:2205.08696*, 2022.
- [50] Julius Adebayo, Michael Muelly, Harold Abelson, and Been Kim. Post hoc explanations may be ineffective for detecting unknown spurious correlation. In *International Conference on Learning Representations*, 2022.
- [51] Mengjiao Yang and Been Kim. Benchmarking attribution methods with relative feature importance. *arXiv preprint arXiv:1907.09701*, 2019.
- [52] Pieter-Jan Kindermans, Sara Hooker, Julius Adebayo, Maximilian Alber, Kristof T Schütt, Sven Dähne, Dumitru Erhan, and Been Kim. The (un) reliability of saliency methods. In *Explainable AI: Interpreting, Explaining and Visualizing Deep Learning*, pages 267–280. Springer, 2019.

- 473 [53] Dylan Slack, Anna Hilgard, Himabindu Lakkaraju, and Sameer Singh. Counterfactual expla-  
 474 nations can be manipulated. *Advances in neural information processing systems*, 34:62–75,  
 475 2021.
- 476 [54] Adam Ivankay, Ivan Girardi, Chiara Marchiori, and Pascal Frossard. Fooling explanations in  
 477 text classifiers. *arXiv preprint arXiv:2206.03178*, 2022.
- 478 [55] Blair Bilodeau, Natasha Jaques, Pang Wei Koh, and Been Kim. Impossibility theorems for  
 479 feature attribution. *arXiv preprint arXiv:2212.11870*, 2022.
- 480 [56] Pang Wei Koh and Percy Liang. Understanding black-box predictions via influence functions.  
 481 In *International conference on machine learning*, pages 1885–1894. PMLR, 2017.
- 482 [57] Andrew Ilyas, Sung Min Park, Logan Engstrom, Guillaume Leclerc, and Aleksander Madry.  
 483 Datamodels: Predicting predictions from training data. *arXiv preprint arXiv:2202.00622*, 2022.
- 484 [58] Sung Min Park, Kristian Georgiev, Andrew Ilyas, Guillaume Leclerc, and Aleksander Madry.  
 485 Trak: Attributing model behavior at scale. *arXiv preprint arXiv:2303.14186*, 2023.
- 486 [59] Diederik P Kingma and Jimmy Ba. Adam: A method for stochastic optimization. *arXiv preprint*  
 487 *arXiv:1412.6980*, 2014.

## 488 A Proofs and Theoretical Discussions

489 Here we present the proofs of our main results, as well as some extensions to MuS.

### 490 A.1 Proofs of Main Results

#### 491 A.1.1 Proof of Theorem 3.2

492 *Proof.* By linearity we have:

$$g(x, \alpha) - g(x, \alpha') = \mathbb{E}_{s \sim \mathcal{D}} [h(x \odot \tilde{\alpha}) - h(x \odot \tilde{\alpha}')], \quad \tilde{\alpha} = \alpha \odot s, \quad \tilde{\alpha}' = \alpha' \odot s,$$

493 so it suffices to analyze an arbitrary term by fixing some  $s \sim \mathcal{D}$ . Consider any  $x \in \mathcal{X}$ , let  
 494  $\alpha, \alpha' \in \{0, 1\}^n$ , and define  $\delta = \alpha - \alpha'$ . Observe that  $\tilde{\alpha}_i \neq \tilde{\alpha}'_i$  exactly when  $|\delta_i| = 1$  and  $s_i = 1$ .  
 495 Since  $s_i \sim \mathcal{B}(\lambda)$ , we thus have  $\Pr[\tilde{\alpha}_i \neq \tilde{\alpha}'_i] = \lambda|\delta_i|$ , and applying the union bound:

$$\Pr_{s \sim \mathcal{D}} [\tilde{\alpha} \neq \tilde{\alpha}'] = \Pr_{s \sim \mathcal{D}} \left[ \bigcup_{i=1}^n \tilde{\alpha}_i \neq \tilde{\alpha}'_i \right] \leq \sum_{i=1}^n \lambda|\delta_i| = \lambda \|\delta\|_1,$$

496 and so:

$$\begin{aligned} |g(x, \alpha) - g(x, \alpha')| &= \left| \mathbb{E}_{s \sim \mathcal{D}} [h(x \odot \tilde{\alpha}) - h(x \odot \tilde{\alpha}')] \right| \\ &= \left| \Pr_{s \sim \mathcal{D}} [\tilde{\alpha} \neq \tilde{\alpha}'] \cdot \mathbb{E}_{s \sim \mathcal{D}} [h(x \odot \tilde{\alpha}) - h(x \odot \tilde{\alpha}') \mid \tilde{\alpha} \neq \tilde{\alpha}'] \right. \\ &\quad \left. - \Pr_{s \sim \mathcal{D}} [\tilde{\alpha} = \tilde{\alpha}'] \cdot \mathbb{E}_{s \sim \mathcal{D}} [h(x \odot \tilde{\alpha}) - h(x \odot \tilde{\alpha}') \mid \tilde{\alpha} = \tilde{\alpha}'] \right|. \end{aligned}$$

497 Note that  $\mathbb{E} [h(x \odot \tilde{\alpha}) - h(x \odot \tilde{\alpha}') \mid \tilde{\alpha} = \tilde{\alpha}'] = 0$ , and so

$$\begin{aligned} |g(x, \alpha) - g(x, \alpha')| &= \Pr_{s \sim \mathcal{D}} [\tilde{\alpha} \neq \tilde{\alpha}'] \cdot \underbrace{\left| \mathbb{E}_{s \sim \mathcal{D}} [h(x \odot \tilde{\alpha}) - h(x \odot \tilde{\alpha}') \mid \tilde{\alpha} \neq \tilde{\alpha}'] \right|}_{\leq 1 \text{ because } h(\cdot) \in [0, 1]} \\ &\leq \Pr_{s \sim \mathcal{D}} [\tilde{\alpha} \neq \tilde{\alpha}'] \\ &\leq \lambda \|\delta\|_1. \end{aligned}$$

498 Thus,  $g(x, \cdot)$  is  $\lambda$ -Lipschitz in the  $\ell^1$  norm. □

#### 499 A.1.2 Proof of Theorem 3.3

500 *Proof.* We first show incremental stability. Consider any  $x \in \mathcal{X}$ , then by masking equivalence:

$$f(x \odot \varphi(x)) = g(x \odot \varphi(x), \mathbf{1}) = g(x, \varphi(x)),$$

501 and let  $g_A, g_B$  be the top two logits of  $g$  as defined in (1). By Theorem 3.2, both  $g_A, g_B$  are Lipschitz  
 502 in their second parameter, and so for all  $\alpha \in \{0, 1\}^n$ :

$$\begin{aligned} \|g_A(x, \varphi(x)) - g_A(x, \alpha)\|_1 &\leq \lambda \|\varphi(x) - \alpha\|_1 \\ \|g_B(x, \varphi(x)) - g_B(x, \alpha)\|_1 &\leq \lambda \|\varphi(x) - \alpha\|_1 \end{aligned}$$

503 Observe that if  $\alpha$  is sufficiently close to  $\varphi(x)$ , i.e.:

$$2\lambda \|\varphi(x) - \alpha\|_1 \leq g_A(x, \varphi(x)) - g_B(x, \varphi(x)),$$

504 then the top logit index of  $g(x, \varphi(x))$  and  $g(x, \alpha)$  are the same. This means that  $g(x, \varphi(x)) \cong g(x, \alpha)$   
 505 and thus  $f(x \odot \varphi(x)) \cong f(x \odot \alpha)$ , thus proving incremental stability with radius  $d(x, \varphi(x))/(2\lambda)$ .

506 The decremental stability case is similar, except we replace  $\varphi(x)$  with  $\mathbf{1}$ . □

## 507 A.2 Some Basic Extensions

508 Below we present some extensions to MuS that help increase the fraction of the input to which we  
 509 can guarantee stability.

### 510 A.2.1 Feature Grouping

511 We have so far assumed that  $\mathcal{X} = \mathbb{R}^n$ , but sometimes it may be desirable to group features together,  
 512 e.g. color channels of the same pixel. Our results also hold for more general  $\mathcal{X} = \mathbb{R}^{d_1} \times \dots \times \mathbb{R}^{d_n}$ ,  
 513 where for such  $x \in \mathcal{X}$  and  $\alpha \in \mathbb{R}^n$  we lift  $\odot$  as

$$\odot : \mathcal{X} \times \mathbb{R}^n \rightarrow \mathcal{X}, \quad (x \odot \alpha)_i = x_i \cdot \mathbb{I}[\alpha_i = 1] \in \mathbb{R}^{d_i}.$$

514 All of our proofs are identical under this construction, with the exception of the dimensionalities of  
 515 terms like  $(x \odot \alpha)$ . An example of feature grouping is given in Figure 1.

## 516 B All Experiments

517 **Models, Datasets, and Explanation Methods** We evaluate on two vision models (Vision Trans-  
 518 former [9] and ResNet50 [28]) and one language model (RoBERTa [29]). For the vision dataset we  
 519 use ImageNet1K [30] and for the language dataset we use TweetEval [31] sentiment analysis. We  
 520 use four explanation methods in SHAP [7], LIME [6], Integrated Gradients (IGrad) [8], and Vanilla  
 521 Gradient Saliency (VGrad) [5]; where we take  $\varphi(x)$  as the top- $k$  weighted features.

522 **Training Details** We use Adam [59] as our optimizer with default parameters and learning rate  
 523  $10^{-6}$ . For each  $\lambda \in \{1/8, \dots, 8/8\}$  we fine-tuned each model for 1 epoch, which results in a total of  
 524  $8 \times 3 = 24$  models used in our experiments. To train with a particular  $\lambda$ : for each training input  $x$  we  
 525 generate two random maskings — one where  $\lambda$  of the features are zeroed and one where  $\lambda/2$  of the  
 526 features are zeroed. This additional  $\lambda/2$  zeroing is to account for the fact that inputs to a smoothed  
 527 model will be subject to masking by  $\lambda$  as well as  $\varphi(x)$ , where the scaling factor of  $1/2$  is informed  
 528 by our prior experience about the size of a stable explanation.

529 **Miscellaneous Preprocessing** For images in ImageNet1K we use feature grouping (Section A.2.1)  
 530 to group the  $3 \times 224 \times 224$  dimensional image into patches of size  $3 \times 28 \times 28$ , such that there  
 531 remains  $n = 64$  feature groups. Each feature of a feature group then receives the same value of  
 532 noise during smoothing. We report radii of stability as a fraction of the feature groups covered. For  
 533 example, if at some input from ImageNet1K we get an incremental stability radius of  $r$ , then we  
 534 report  $r/64$  as the fraction of features up to which we are guaranteed to be stable. This is especially  
 535 amenable to evaluating RoBERTa on TweetEval where inputs do not have uniform token lengths, i.e.  
 536 do not have uniform feature dimensions. In all of our experiments we use the quantized noise as in  
 537 Section 3.3 with a quantization parameter of  $q = 64$ , with the exception of Appendix B.2 where for  
 538 the box attack search we use  $q = 16$ .

539 Our experiments are organized as follows:

- 540 • (Section B.1) What is the quality of stability guarantees?
- 541 • (Section B.2) What is the theoretical vs empirical stability that can be guaranteed?
- 542 • (Section B.3) What are the stability-accuracy trade-offs?
- 543 • (Section B.4) Which explanation method is best?

### 544 B.1 Quality of Stability Guarantees

545 Here we study what radii of stability are certifiable, and how often these can be achieved with different  
 546 models and explanation methods. We therefore consider explainable models  $\langle f, \varphi \rangle$  constructed  
 547 from base models  $h \in \{\text{Vision Transformer, ResNet50, RoBERTa}\}$  and explanation methods  $\varphi \in$   
 548  $\{\text{SHAP, LIME, IGrad, VGrad}\}$  with top- $k \in \{1/8, 2/8, 3/8\}$  feature selection. We take  $N = 2000$   
 549 samples from each model’s respective datasets and compute the following value for each radius:

$$\text{value}(r) = \frac{\#\{x : \langle f, \varphi \rangle \text{ consistent and inc (dec) stable with radius} \leq r\}}{N}.$$

550 Plots of incremental stability are on the left; plots of decremental stability are on the right.

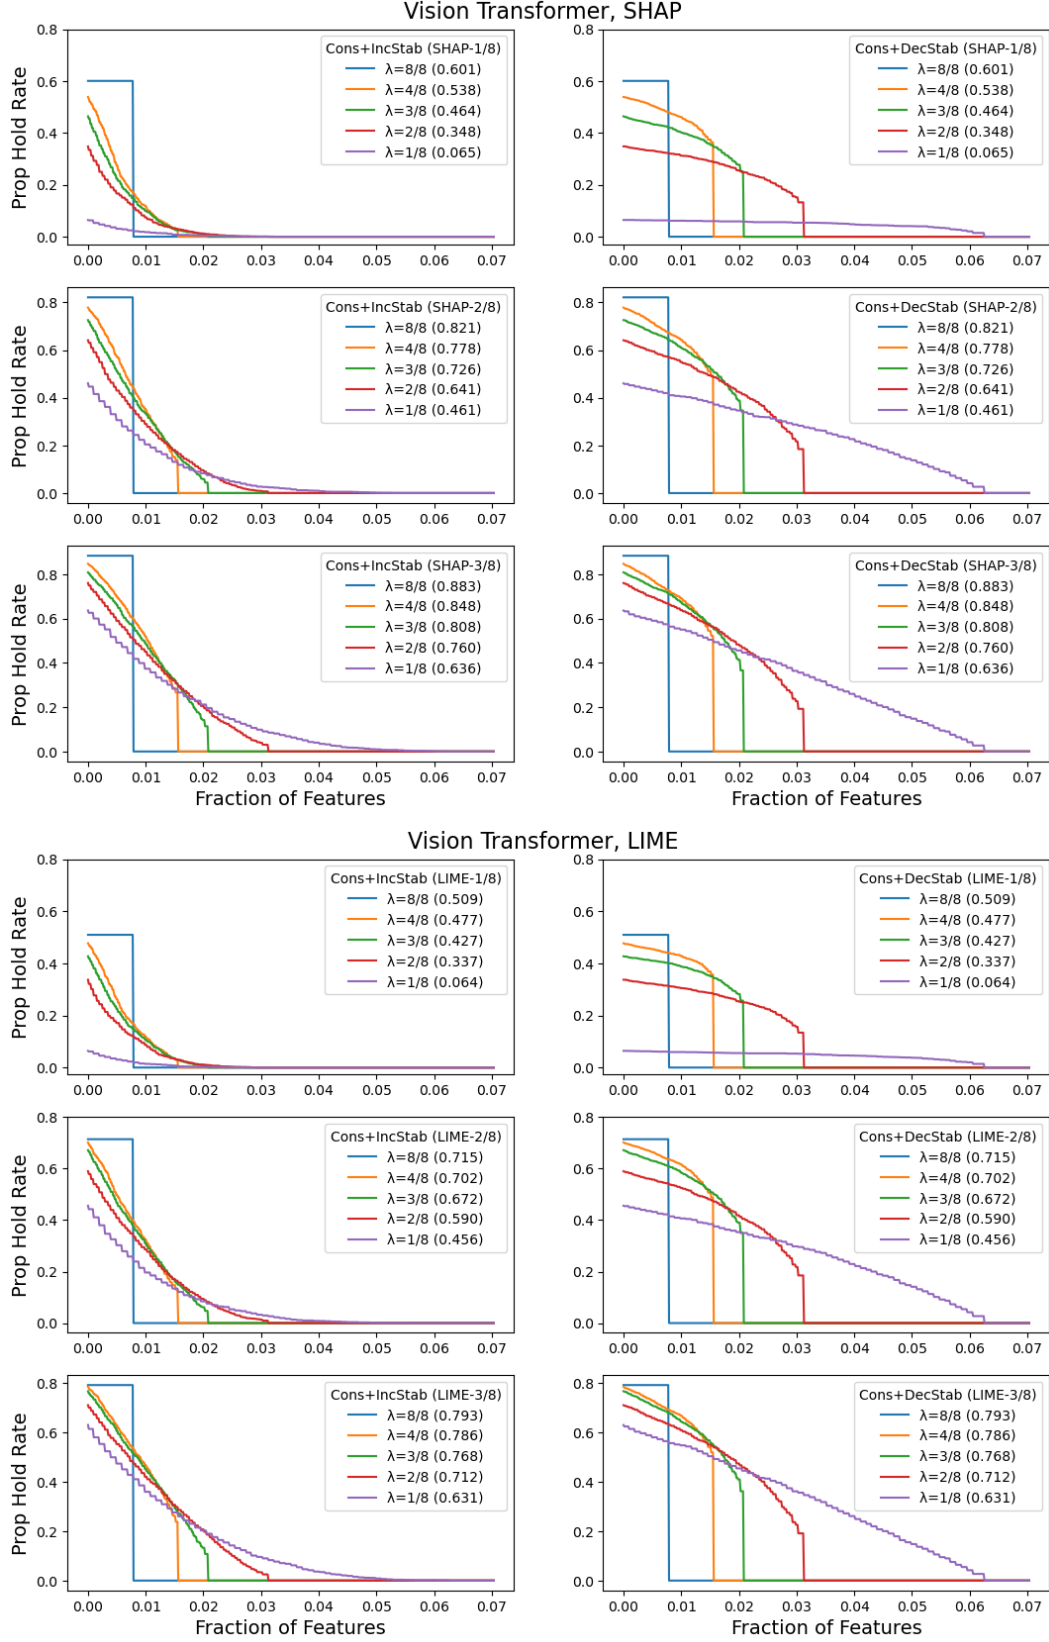

Figure 7: (Top) Vision Transformer with SHAP; (Bottom) Vision Transformer with LIME. (Left) consistent and incrementally stable; (Right) consistent and decrementally stable.



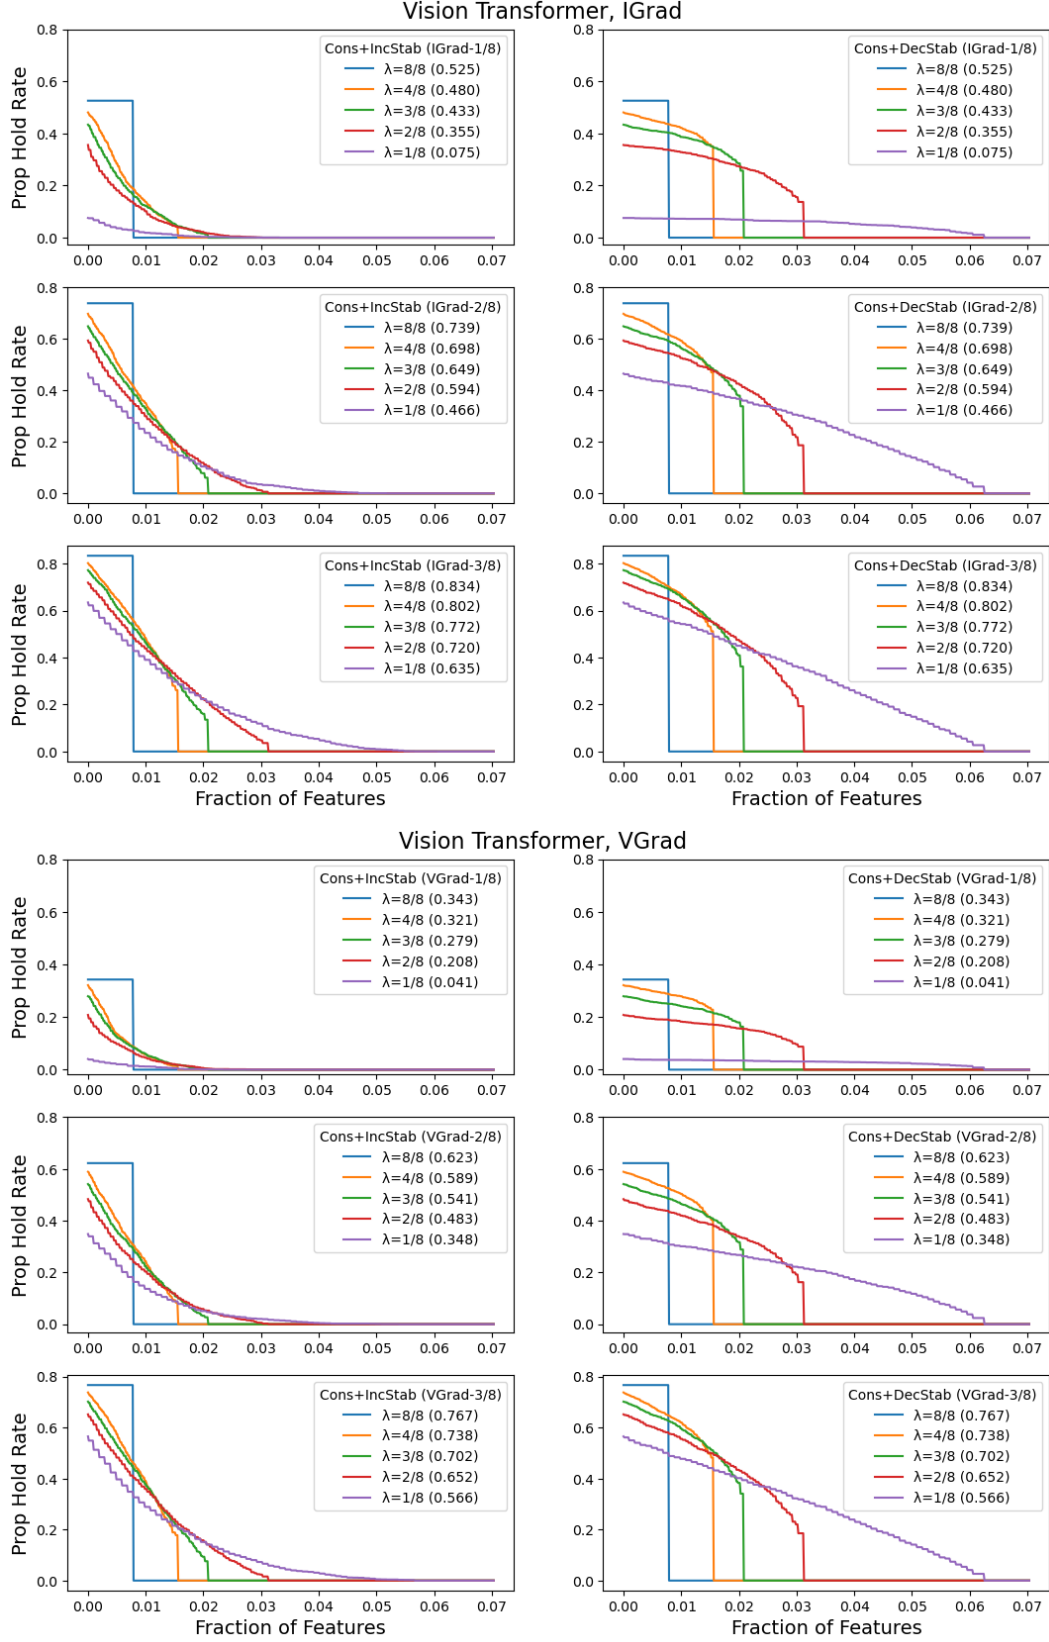

Figure 8: (Top) Vision Transformer with IGrad; (Bottom) Vision Transformer with VGrad. (Left) consistent and incrementally stable; (Right) consistent and decrementally stable.

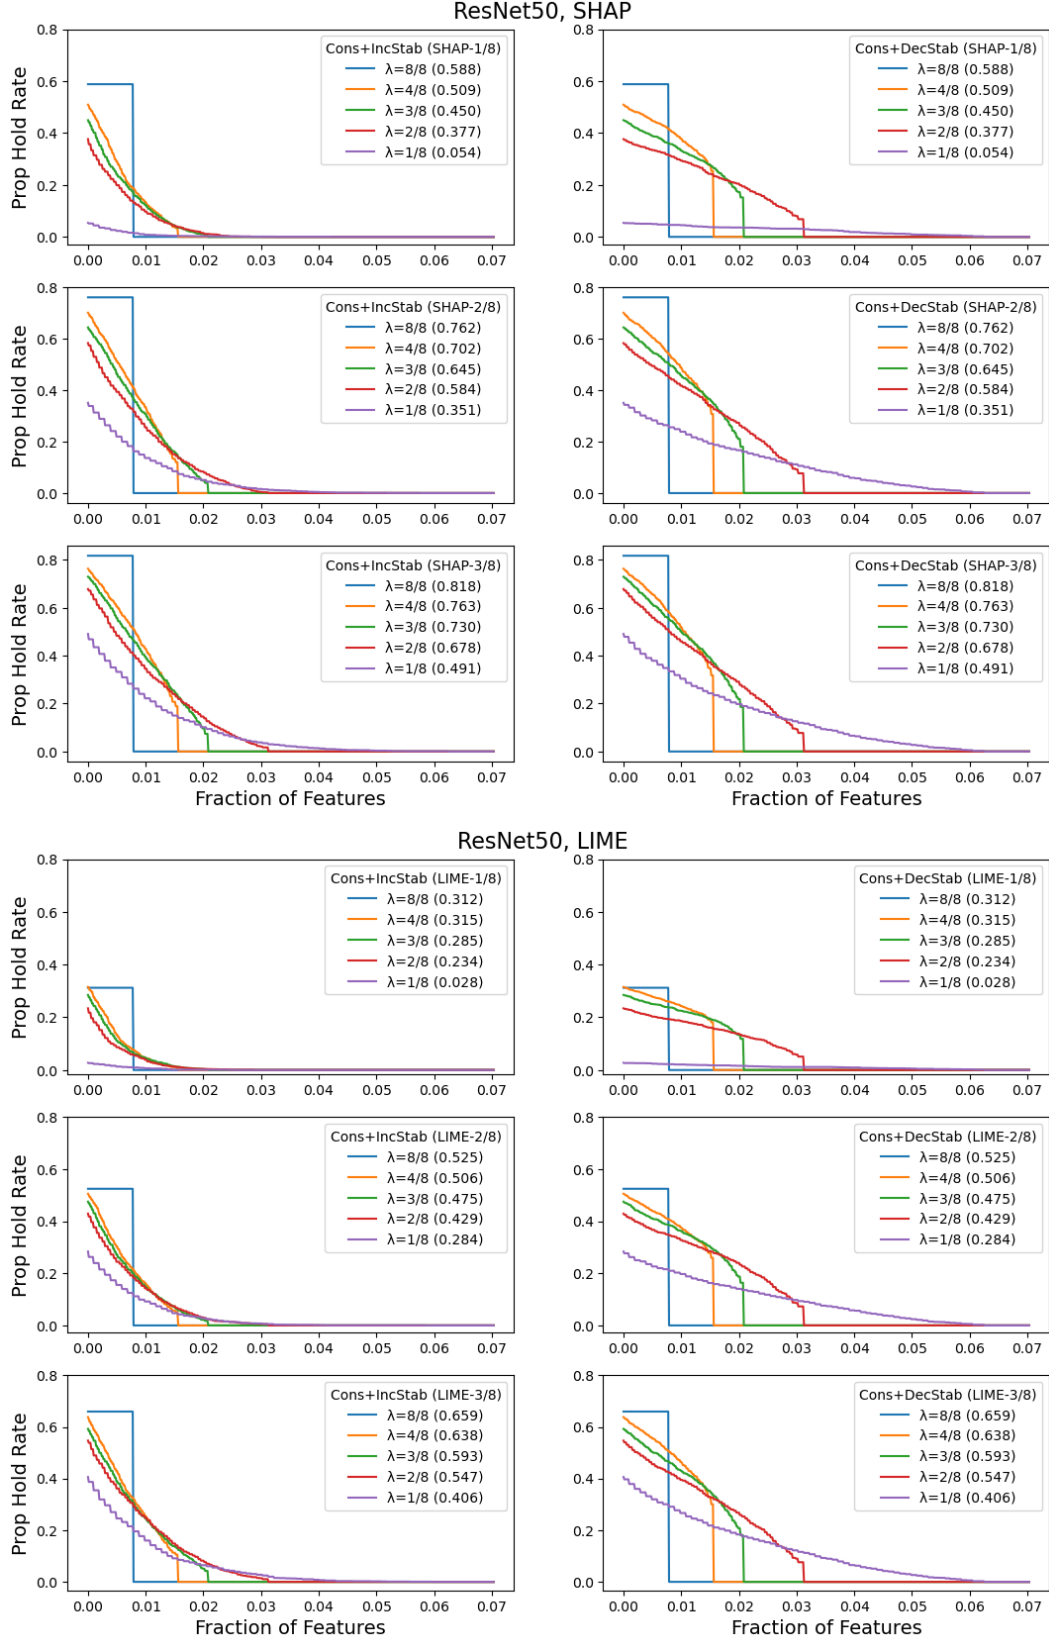

Figure 9: (Top) ResNet50 with SHAP; (Bottom) ResNet50 with LIME. (Left) consistent and incrementally stable; (Right) consistent and decrementally stable.

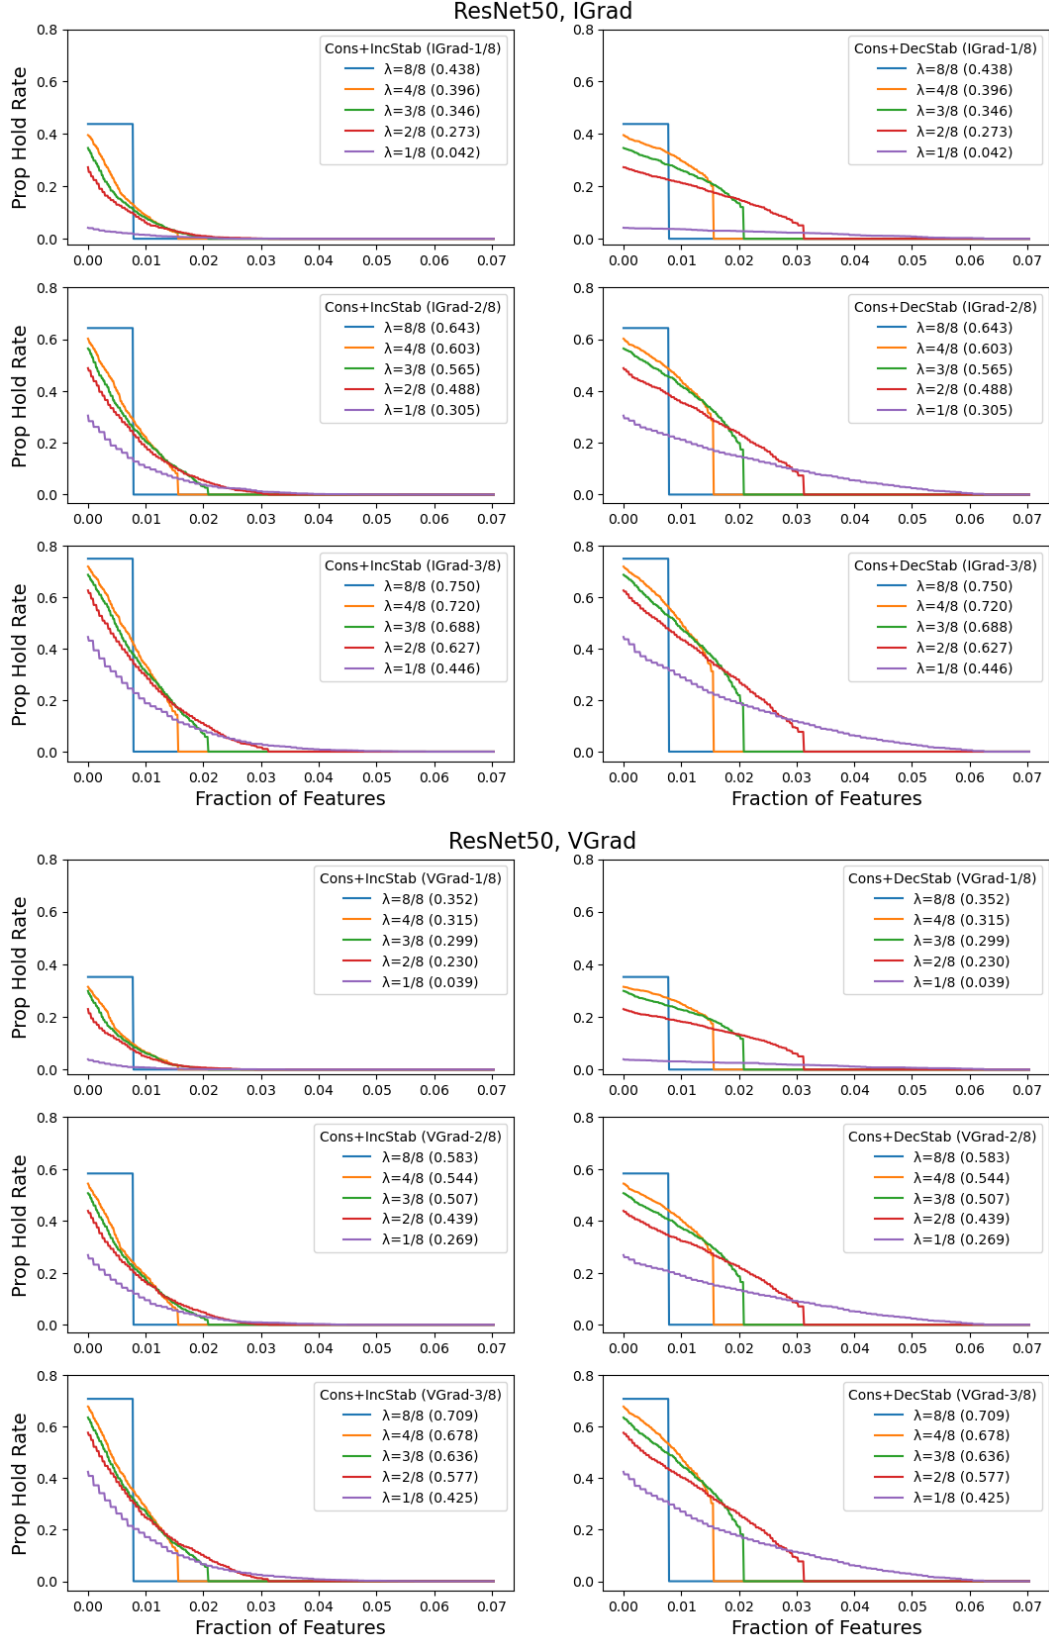

Figure 10: (Top) ResNet50 with IGrad; (Bottom) ResNet50 with VGrad. (Left) consistent and incrementally stable; (Right) consistent and decrementally stable.

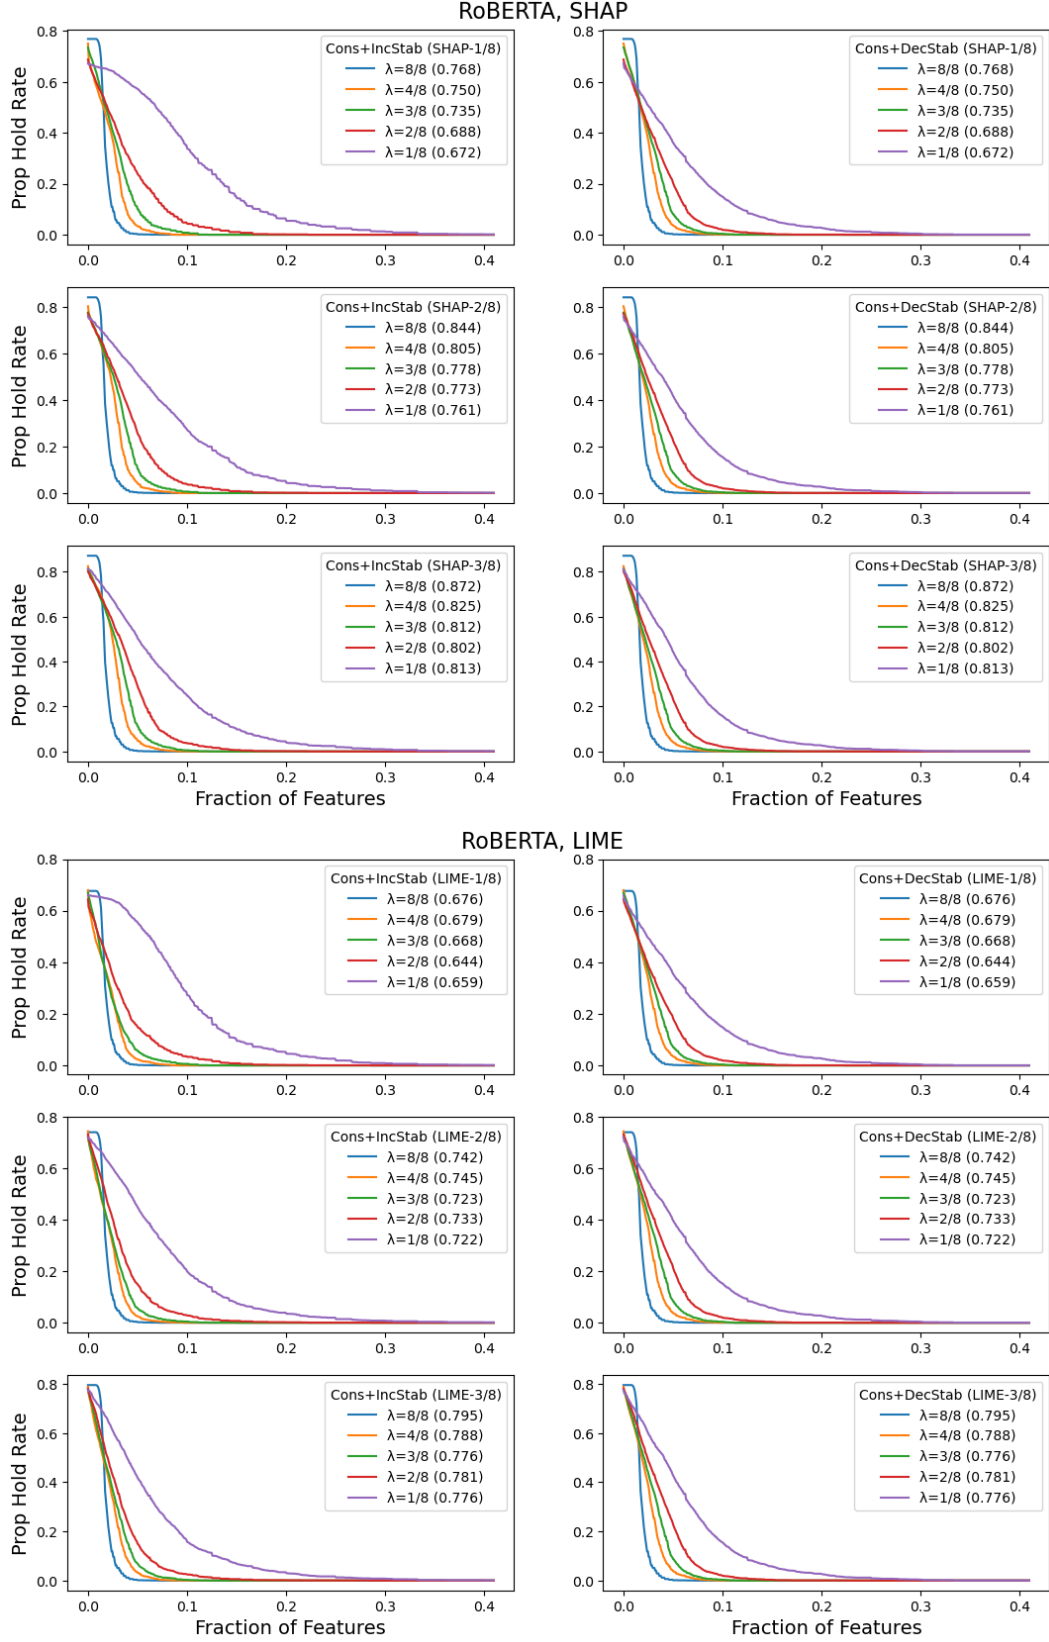

Figure 11: (Top) RoBERTa with SHAP; (Bottom) RoBERTa with LIME. (Left) consistent and incrementally stable; (Right) consistent and decrementally stable.

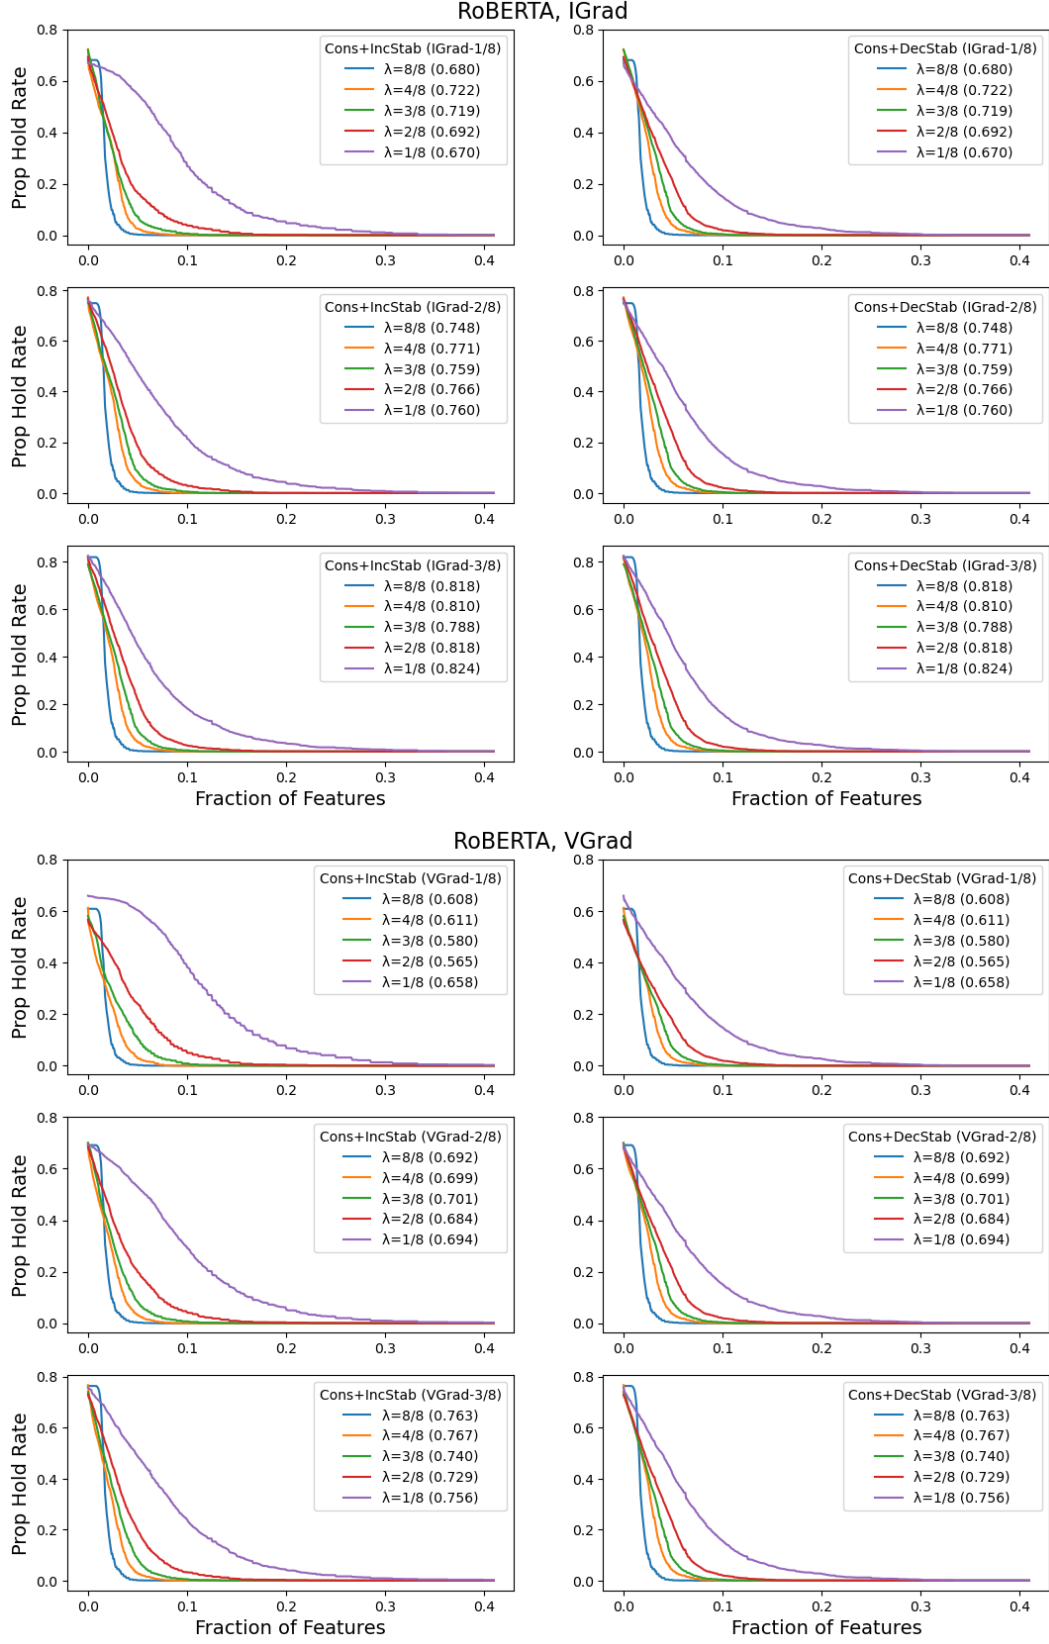

Figure 12: (Top) RoBERTa with IGrad; (Bottom) RoBERTa with VGrad. (Left) consistent and incrementally stable; (Right) consistent and decrementally stable.

## 551 B.2 Theoretical vs Empirical

552 We compare the certifiable theoretical stability guarantees with what is empirically attained via  
 553 a standard box attack search [32]. This is an extension of Section 4.2, where we now show all  
 554 models as evaluated with SHAP-top25%. The certified plots are identical from Appendix B.1. We  
 555 take  $N_{\text{cert}} = 2000$  samples for the certified plots, and  $N_{\text{emp}} = 250$  for the empirical plots. This  
 556 comparatively small selection of methods and data is because box attack is very time-intensive.

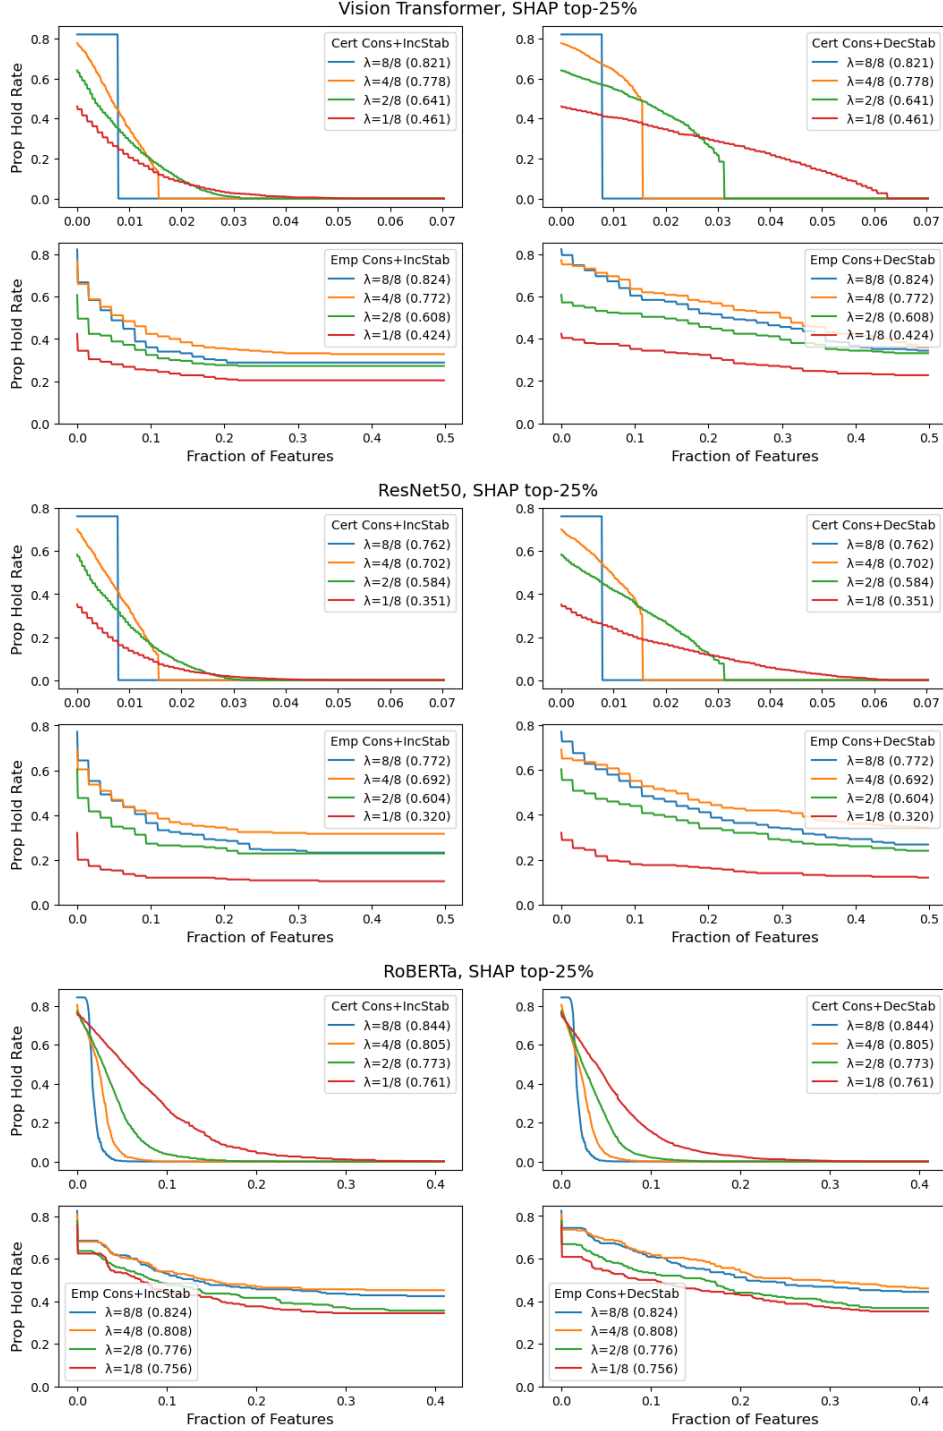

Figure 13: With SHAP top-25%: (Top) Vision Transformer; (Middle) ResNet50; (Bottom) RoBERTa.

### 557 B.3 Stability-Accuracy Trade-Offs

558 We study how the accuracy degrades with  $\lambda$ . We consider a smoothed model  $f$  constructed from a base  
 559 classifier  $h \in \{\text{Vision Transformer, ResNet50, RoBERTa}\}$  and vary  $\lambda \in \{1/16, 1/8, 2/8, 4/8, 8/8\}$ .  
 560 We then take  $N = 2000$  samples from each respective dataset and measure the accuracy of  $f$  at  
 561 different radii. We use  $f(x) \cong \text{true\_label}$  to mean that  $f$  attained the correct prediction at  $x \in \mathcal{X}$ ,  
 562 and we plot the following value at each radius  $r$ :

$$\text{value}(r) = \frac{\#\{x : f(x) \cong \text{true\_label} \text{ and dec stable with radius } \leq r\}}{N}$$

563 The overall accuracy with each  $\lambda$  is shown in the parentheses of each plot's legend.

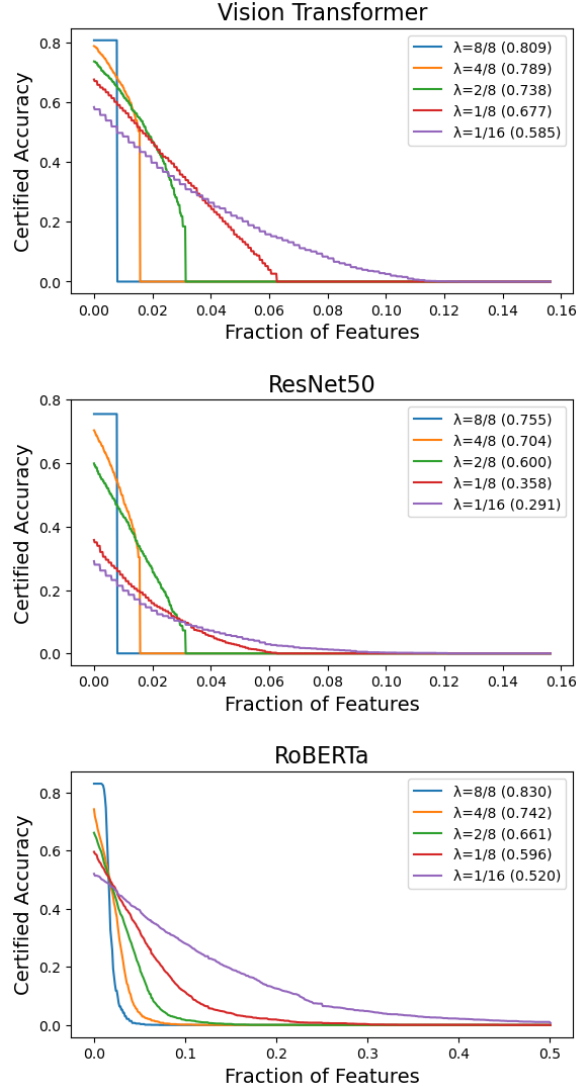

Figure 14: (Top) Vision Transformer; (Middle) ResNet50; (Bottom) RoBERTa.



#### 564 B.4 Which Explanation Method is the Best?

565 We first investigate how many features are needed to yield consistent and non-trivially stable explanations, as done by the greedy selection algorithm in Section 2.4. For some  $x \in \mathcal{X}$ , let  $k_x$  denote the  
 566 fraction of features that  $\langle f, \varphi \rangle$  needs to be consistent, incrementally stable, and decrementally stable  
 567 with radius 1. We vary  $\lambda \in \{1/8, \dots, 4/8\}$ , where recall  $\lambda \leq 4/8$  is needed for non-trivial stability,  
 568 and use  $N = 250$  samples to plot the average  $k_x$ . This part is identical to Section 4.3.

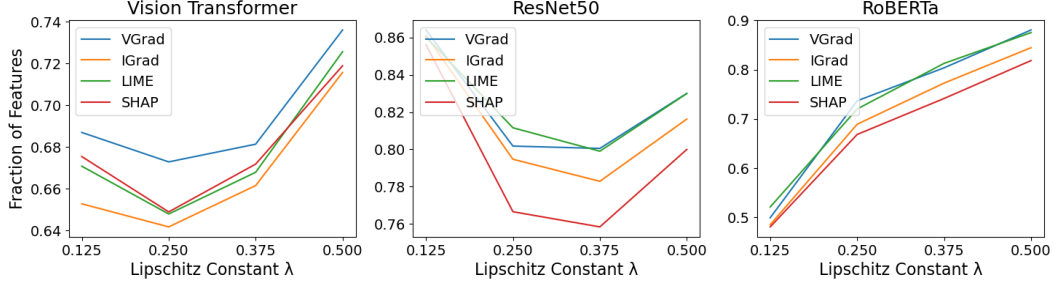

Figure 15: (Left) Vision Transformer; (Middle) ResNet50; (Right) RoBERTa.

570 We next investigate the ability of each method to predict features that lead to high accuracy. Let  
 571  $f(x \odot \varphi(x)) \cong \text{true\_label}$ , mean that the masked input  $x \odot \varphi(x)$  yields the correct prediction.  
 572 We then plot this accuracy as we vary the top- $k \in \{1/8, 2/8, 3/8\}$  for different methods  $\varphi$ , and  
 573  $\lambda \in \{1/8, \dots, 8/8\}$ , using  $N = 2000$  samples.

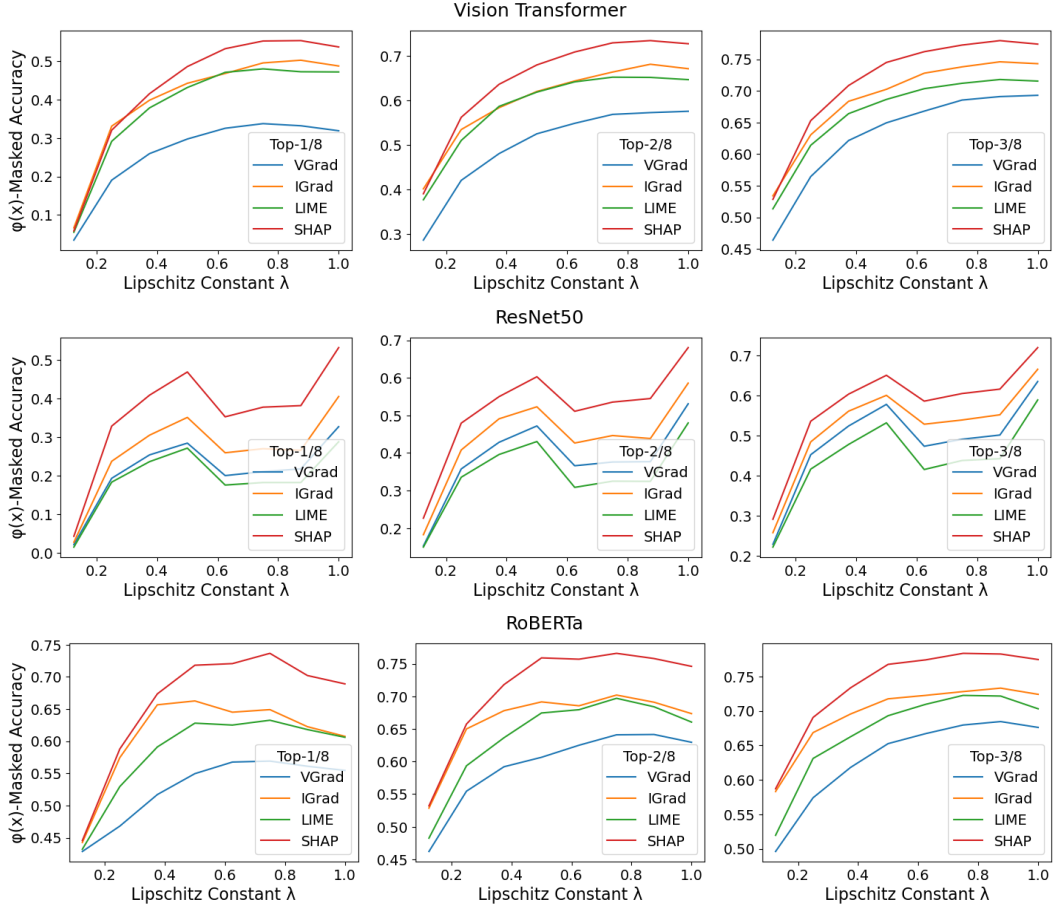

Figure 16: (Top) Vision Transformer; (Middle) ResNet50; (Bottom) RoBERTa.



## 574 B.5 Discussion

575 **Effect of Smoothing** We observe that smoothing can yield non-trivial stability guarantees, espe-  
576 cially for Vision Transformer and RoBERTa, as evidenced in Appendix B.1. We see that smoothing  
577 is least detrimental on these two transformer-based architectures, and most negatively impacts the  
578 performance of ResNet50. We conjecture that although different training set-ups may improve  
579 performance across every category, this still serves to illustrate the general trend.

580 **Theoretical vs Empirical** It is expected that the certifiable radii of stability is more conservative  
581 than what is empirically observed. As mentioned in Section 3.2, for each  $\lambda$  there is a maximum  
582 radius to which stability can be guaranteed, which is an inherent limitation of using logit gaps and  
583 Lipschitz constants as the main theoretical technique. We emphasize that the notion of stability need  
584 not be tied to smoothing, though we are currently not aware of other viable approaches.

585 **Why these Explanation Methods?** We chose SHAP, LIME, IGrad, and VGrad from among the  
586 large variety of methods available primarily due to their popularity, and because we believe that  
587 they are collectively representative of many techniques. In particular, we believe that LIME remains  
588 representative baseline for surrogate model-based explanation methods. SHAP and IGrad are, to our  
589 knowledge, the two most well-known families of axiomatic feature attribution methods. Finally, we  
590 believe that VGrad is representative of a traditional gradient saliency-based approach.

591 **Which Explanation Method is the Best?** Based on our experiments in Appendix B.4 we see that  
592 SHAP generally achieves higher accuracy using the same amount of top- $k$  features as other methods.  
593 On the other hand, VGrad tends to perform poorly. We remark that there is well-known critique  
594 against the usefulness of saliency-based explanation methods [52].

## 595 C Miscellaneous

596 **Relevance to Other Explanation Methods** Our key theoretical contribution of MuS in Theorem 3.2  
597 is a general-purpose smoothing method that is distinct from standard smoothing techniques, namely  
598 additive smoothing. MuS is therefore applicable to other problem domains beyond what is studied in  
599 this paper, and would be useful where Lipschitz constants with respect to maskings is desirable.

600 **Broader Impacts** Reliable explanations are necessary for making well-informed decisions, and are  
601 increasingly important as machine learning models are integrated with fields like medicine, law, and  
602 business — where the primary users may not be well-versed in the technical limitations of different  
603 methods. Formal guarantees are therefore important for ensuring the predictability and reliability  
604 of complex system, which then allows users to construct accurate mental models of interaction and  
605 behavior. In this work we study a particular kind of guarantee known as stability, which is key to  
606 feature attribution-based explanation methods.
